# Supplementary material for: Epithelial-Mesenchymal Transition Induces Podocalyxin to Promote Extravasation via Ezrin Signaling
Source: PubMed Central journal article supplement — Cell Rep. Author manuscript; Available in PMC 2018 Oct 11. (PMC6181240; doi:10.1016/j.celrep.2018.06.092), 2018-07-24
Supplement: NIHMS1503266-supplement-4.pdf [file NIHMS1503266-supplement-4.pdf]

## Epithelial-Mesenchymal Transition Induces Podocalyxin to Promote Extravasation via Ezrin Signaling

### Graphical Abstract

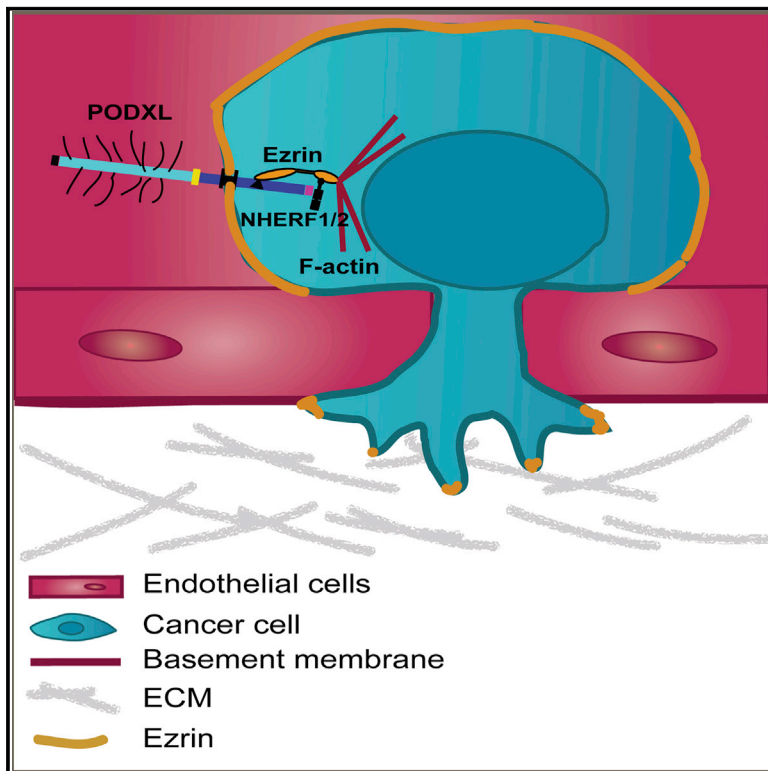

### Highlights

- Activation of an EMT in carcinoma cells increases their extravasation efficiency
- The EMT-induced protein podocalyxin (PODXL) is a mediator of extravasation
- PODXL promotes extravasation through direct interaction with ezrin
- Ezrin orchestrates cortical polarization in extravasating cancer cells

### Authors

Julia Fröse, Michelle B. Chen, Katie E. Hebron, ..., Andries Zijlstra, Roger D. Kamm, Robert A. Weinberg

### Correspondence

weinberg@wi.mit.edu

### In Brief

Fröse et al. investigate the influence of the EMT program on extravasation by applying diverse experimental tools to visualize and quantify this highly dynamic process. They discover that the EMT-induced protein podocalyxin (PODXL) promotes extravasation through direct interaction with the cytoskeletal linker protein ezrin.

### Data and Software Availability

GSE74883

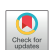

# Epithelial-Mesenchymal Transition Induces Podocalyxin to Promote Extravasation via Ezrin Signaling

Julia Fröse,<sup>1,2</sup> Michelle B. Chen,<sup>3</sup> Katie E. Hebron,<sup>4</sup> Ferenc Reinhardt,<sup>1</sup> Cynthia Hajal,<sup>3</sup> Andries Zijlstra,<sup>5,6</sup> Roger D. Kamm,<sup>3,7</sup> and Robert A. Weinberg<sup>1,8,9,10,\*</sup>

<sup>1</sup>Whitehead Institute for Biomedical Research, Cambridge, MA 02142, USA

<sup>2</sup>Faculty of Biosciences, University of Heidelberg, 69117 Heidelberg, Germany

<sup>3</sup>Department of Mechanical Engineering, Massachusetts Institute of Technology, Cambridge, MA 02139, USA

<sup>4</sup>Laboratory of Cellular and Molecular Biology, National Cancer Institute, NIH, Bethesda, MD, USA

<sup>5</sup>Department of Pathology, Microbiology and Immunology, Vanderbilt University, Nashville, TN 37232, USA

<sup>6</sup>Vanderbilt-Ingram Cancer Center, Vanderbilt University, Nashville, TN 37232, USA

<sup>7</sup>Department of Biological Engineering, Massachusetts Institute of Technology, Cambridge, MA 02142, USA

<sup>8</sup>Ludwig/MIT Center for Molecular Oncology, Cambridge, MA 02142, USA

<sup>9</sup>Department of Biology, Massachusetts Institute of Technology, Cambridge, MA 02142, USA

<sup>10</sup>Lead Contact

\*Correspondence: [weinberg@wi.mit.edu](mailto:weinberg@wi.mit.edu)

<https://doi.org/10.1016/j.celrep.2018.06.092>

## SUMMARY

The epithelial-mesenchymal transition (EMT) endows carcinoma cells with traits needed to complete many of the steps leading to metastasis formation, but its contributions specifically to the late step of extravasation remain understudied. We find that breast cancer cells that have undergone an EMT extravasate more efficiently from blood vessels both *in vitro* and *in vivo*. Analysis of gene expression changes associated with the EMT program led to the identification of an EMT-induced cell-surface protein, podocalyxin (PODXL), as a key mediator of extravasation in mesenchymal breast and pancreatic carcinoma cells. PODXL promotes extravasation through direct interaction of its intracellular domain with the cytoskeletal linker protein ezrin. Ezrin proceeds to establish dorsal cortical polarity, enabling the transition of cancer cells from a non-polarized, rounded cell morphology to an invasive extravasation-competent shape. Hence, the EMT program can directly enhance the efficiency of extravasation and subsequent metastasis formation through a PODXL-ezrin signaling axis.

## INTRODUCTION

Metastasis accounts for more than 90% of all cancer-related death, yet the mechanisms underlying this process remain incompletely understood (Lambert et al., 2017). In order to metastasize, cancer cells need to complete a series of distinct steps, including invasion into the stroma surrounding the primary tumor, entry into the lumina of blood vessels, survival in the cir-

ulation, extravasation from the vasculature, formation of micro-metastases, and finally proliferation within the microenvironment of a distant organ leading to the formation of macroscopic metastases (Fidler, 2002). Carcinoma cells can acquire many of the traits needed to complete this cascade by undergoing an epithelial-mesenchymal transition (EMT) (Thiery et al., 2009). A number of studies have focused on the role of the EMT program in invasion and intravasation into blood vessels (Boyer and Thiery, 1993). Recent studies from our lab also suggest a role for this program in the post-extravasation proliferation of disseminated cancer cells and the outgrowth of macrometastases, the latter process termed metastatic colonization (De Cock et al., 2016; Shibue et al., 2013). In contrast, little is known about the role of the EMT program and its molecular mechanisms specifically during extravasation. Evidence suggesting a contribution of EMT to extravasation is fragmentary and largely correlative (Labelle et al., 2011; Stoletov et al., 2010; Yadavalli et al., 2017).

In the present study we describe the influence of the EMT program on extravasation by applying diverse experimental tools to visualize and quantify this highly dynamic process. We observe epithelial and mesenchymal breast cancer cells in high spatiotemporal resolution using the chick chorioallantoic membrane (CAM) and an *in vitro* microvascular network platform and find that activation of the EMT program enhances cancer cell extravasation in both of these settings. By analyzing gene expression changes associated with the EMT program, we have uncovered a mediator of the extravasation process and find that a member of the CD34 family of cell surface sialomucins, podocalyxin (PODXL), promotes extravasation and thus subsequent metastasis of cancer cells. Finally, we show that PODXL exerts its effect on extravasation by directly engaging the actin cytoskeletal linker protein ezrin to orchestrate cortical polarization in extravasating cancer cells, enabling them to initiate migration across the endothelium prior to entering the parenchyma of distant tissues.

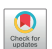

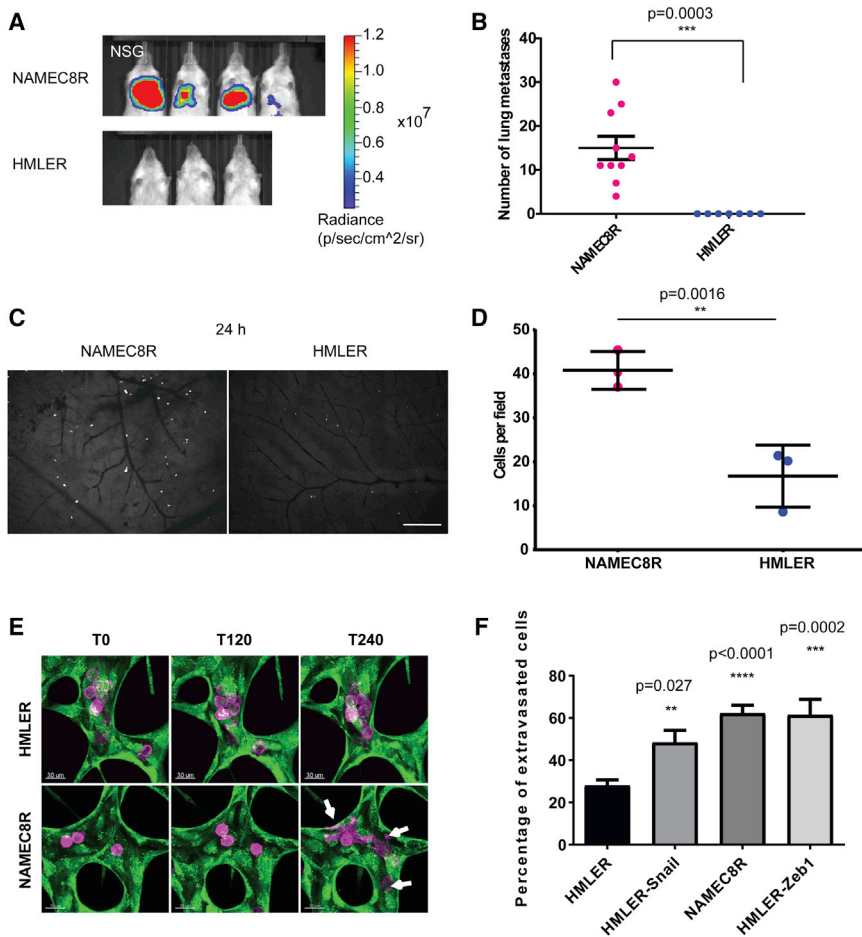

**Figure 1. Breast Carcinoma Cells that Have Undergone an EMT Show Enhanced Lung Metastasis and Extravasation Efficiency**

(A) Bioluminescent imaging 6 weeks post-injection of mice injected with  $2.5 \times 10^5$  NAMEC8R or HMLER cells expressing a luciferase-tdTomato fusion gene.

(B) Quantification of tdTomato-positive carcinoma cells in the mouse lungs ( $n = 7-10$  mice). Data are represented as mean  $\pm$  SEM, and statistics were calculated using Student's t test.

(C) Extravasation *in vivo*. Representative images of NAMEC8R and HMLER cells in the chick CAM 24 hr post-injection.

(D) Quantification of breast carcinoma cells in the CAM injected with  $1 \times 10^5$  NAMEC8R or HMLER cells ( $t = 24$  hr). Data were collected from two or three chicks per group and five random fields of view per section of CAM. Data are represented as mean  $\pm$  SD, and statistics were calculated using the Mann-Whitney U test. Scale bar, 240  $\mu$ m.

(E) Extravasation *in vitro*. Representative images of NAMEC8R and HMLER cells (purple) extravasating from an *in vitro* microvascular network formed by HUVEC-GFP (green) over a time period of 4 hr. Arrows indicate extravasated cancer cells. Scale bars, 30  $\mu$ m.

(F) Quantification of extravasated parental HMLER cells and mesenchymal derivatives (NAMEC8R, HMLER-Snail, HMLER-Zeb1) from microvascular networks ( $t = 5$  hr). Data were collected from three independent experiments, using two or three devices per condition and experiment. Data are represented as mean  $\pm$  SEM, and statistics were calculated using Student's t test.

See also Figure S1 and Videos S1 and S2.

## RESULTS

### Effects of EMT on Extravasation and Metastasis Formation

A mechanistic connection between the EMT program and the process of extravasation has been largely elusive. For this reason, we sought to investigate the effects of the EMT program on the ability of breast carcinoma cells to extravasate. To do so, we used immortalized, H-RAS<sup>G12V</sup>-transformed human mammary epithelial (HMLER) cells as a model system (Elenbaas et al., 2001). These cells were derived from reduction mamplasties and exhibit epithelial traits. Although they can readily form primary tumors upon implantation in the mammary fat pad and subcutaneous sites of immunodeficient mouse hosts, the resulting tumors only rarely metastasize spontaneously to the lungs. However, upon experimental activation of the EMT program, these HMLER cells acquire stem cell-like properties and metastasize from primary tumors ((Mani et al., 2008); unpublished observations).

We first sought to directly compare the abilities of the epithelial HMLER cells and their mesenchymal derivatives to extravasate and colonize the lungs of immunocompromised mice. More specifically, we compared the behavior of parental HMLER cells with a naturally arising mesenchymal epithelial cell (NAMEC8R)

population that had been previously isolated from HMLE cells and subsequently transformed by introduction of an HRAS<sup>G12V</sup> oncogene (Tam et al., 2013). These cells express many of the markers associated with the EMT program, including high levels of CD44, N-cadherin, fibronectin, vimentin, and Zeb1 (Tam et al., 2013). The parental HMLER cells, in contrast, express E-cadherin, EpCAM, and CD24. Of note, because the precursors of the more mesenchymal mammary epithelial cells had arisen spontaneously in culture, they expressed physiologic levels of various EMT-inducing transcription factors (EMT-TFs), such as Zeb1 (Tam et al., 2013).

Six weeks after injection of HMLER cells or NAMEC8Rs into the tail vein of NOD/scid IL-2R $\gamma$ <sup>null</sup> (NSG) mice, bioluminescent imaging (BLI) of firefly luciferase activity revealed that only NAMEC8R, but not HMLER, cells were able to colonize the lungs of these mouse hosts (Figures 1A and 1B). Importantly, the initial numbers of HMLER and NAMEC8R cells in the lungs, measured 10 min and 1 hr after injection, were comparable, indicating that both cell populations were trapped with comparable efficiencies in the microvessels of the lungs (Figure S1A). Accordingly, we undertook to test whether the observed failure of the HMLER cells to form metastases could be attributable to a step after trapping in microvessels but prior to colonization, more specifically to an inability of these cells to efficiently extravasate.

To do so, we used the chick CAM assay, which represents a well-established *in vivo* model for extravasation (Palmer et al., 2011). Thus, we injected HMLER and NAMEC8R cells into the capillary plexus of the CAM and compared their extravasation efficiencies 24 hr post-injection. Interestingly, we found ~2.4-fold more NAMEC8R cells to have extravasated by this time point relative to the more epithelial HMLER cells (Figures 1C and 1D). This provided a direct indication of a possible involvement of the EMT program in the process of extravasation.

In order to extend these studies, we used an *in vitro* three-dimensional (3D) microvascular network platform specifically developed to address the process of extravasation in a highly defined experimental setting (Chen et al., 2013). To produce microvascular networks, human umbilical vein endothelial cells (HUVECs) and normal human lung fibroblasts (NHLFs) are seeded in separate channels in a fibrin hydrogel. In this setting, the suspended HUVECs form microvascular networks that allow the modeling of a variety of cell-biological processes, including the process of extravasation. We note that this experimental system only partially models the complex situation associated with the extravasation of carcinoma cells *in vivo*. Thus, in these *in vitro* microvascular networks, the cancer cells interact with endothelial cells but not with other host cell types, such as natural killer cells, platelets, and neutrophils, as they would *in vivo*.

These microvascular networks have been extensively characterized and exhibit tight endothelial cell-cell junctions, basement membrane deposition, and physiological values of vessel permeability (Chen et al., 2013). In this model system, the extravasation of carcinoma cells can be monitored with high spatio-temporal resolution. We tested the ability of epithelial HMLER cells and mesenchymal derivatives of this cell line to extravasate from these networks over the course of 5 hr following their introduction into the microvessel networks (Videos S1 and S2). In this instance, we used both the above-described mesenchymal counterparts of the HMLER cells that had undergone an EMT spontaneously (NAMEC8R) as well as HMLER cells in which EMT had been experimentally induced through the actions of a doxycycline-inducible vector expressing either the Snail or Zeb1 EMT-TF, termed here HMLER-Snail and HMLER-Zeb1 cells (Figures S1B–S1E). Our observations revealed a modest but consistent and significant elevation (1.6- to 2-fold) of the extravasation efficiency of the various HMLER cells that had undergone an EMT relative to that of the corresponding parental HMLER cells (Figures 1E and 1F; see also Videos S1 and S2 and Figure S1F). Of note, this relative increase was comparable with the difference in extravasation efficiency that we observed *in vivo* in the chick CAM (Figures 1C and 1D).

### Association of the EMT Program with Increased Expression of PODXL in Breast Cancer Cells

These observations prompted us to further investigate the molecular mechanism(s) underlying the observed elevated extravasation efficiency driven by activation of the EMT program in the HMLER cells. To begin, we tested if there were any differences in gene expression levels that could account for the observed increase in extravasation efficiency. More specifically, we used previously reported mRNA sequencing data comparing the differences in mRNA expression of the immortalized, non-

RAS-transformed HMLE and NAMEC8 cells (Pattabiraman et al., 2016). This dataset revealed 256 genes to be upregulated more than 6-fold in the NAMEC8 relative to the parental HMLE cells (Figures S2A). We selected several candidate genes, focusing specifically on cell-surface proteins that might plausibly be involved in the regulation of adhesion to endothelial cells and in the transendothelial migration of these cells. Among the candidate genes we chose were those encoding the disintegrin and metalloproteinase ADAM12, ephrin type-B receptor 6 (EPHB6), PODXL, and the slit guidance ligand 2 (SLIT2) (Figure 2A).

We first examined if the difference in the mRNA expression of these candidate genes was maintained in the RAS-transformed derivatives of HMLE and NAMEC8 cells (i.e., HMLER cells and NAMEC8Rs, respectively) (Figures 2B, S2E, and S2F). The expression of two candidate genes, ADAM12 and PODXL, was also upregulated to a similar level in NAMEC8Rs relative to HMLER cells, but that of SLIT2 was not.

We next confirmed that the candidate genes listed above also exhibit elevated expression in other cell lines of the basal breast cancer subtype, which exhibit an enrichment of cells expressing certain mesenchymal markers (Sarrío et al., 2008), using a publicly available dataset (Kao et al., 2009; Figures S2B–S2D and S3A). The expression of SLIT2, ADAM12, and PODXL was upregulated 4-fold or more in many cell lines of this dataset, but that of EPHB6 was not.

Furthermore, expression of PODXL and ADAM12 mRNAs was progressively upregulated, similar to the mRNAs of well-known EMT proteins (Figures S1C and S1D), over a time course of 14 days in HMLER cells that were forced in culture to undergo an EMT through experimentally induced expression of either the SNAIL or ZEB1 EMT-TF (Figures 2C and S2G). PODXL protein expression was also upregulated in NAMEC8R relative to HMLER cells at the total-cell and cell-surface levels (Figures 2D–2G). Thus, activation of the EMT program can directly induce the expression of PODXL and ADAM12 in breast carcinoma cells. We chose to further investigate the influence of PODXL on the extravasation of cancer cells, as it has been described as a prognostic marker for breast cancer progression and metastasis (Lin et al., 2014; Somasiri et al., 2004).

Of note, PODXL was expressed in the majority of human basal breast cancer cell lines we examined (Figures S3B–S3D). Among these cell lines, highly metastatic MDA-MB-231 breast cancer cells exhibited the highest level of PODXL expression (Figures 2E and S3B–S3D). We also noted that a subclone of the MDA-MB-231 cells selected for its enhanced ability to seed lung metastases (LM2/4175 clone; Minn et al., 2005) expresses PODXL protein levels slightly higher than the corresponding parental cells (Figure S3F). This 4175 clone of the MDA-MB-231 cells also expresses all of the markers associated with an EMT to a greater extent than the parental cells and shows the spindle-shaped morphology associated with expression of an EMT program (Figures S3E and S3F).

### Changes in Extravasation and Metastasis Rates of Carcinoma Cells following Loss of PODXL Expression

On the basis of these data and publications indicating the potential importance of PODXL for metastasis, we decided to examine the involvement of this protein in regulating specifically the

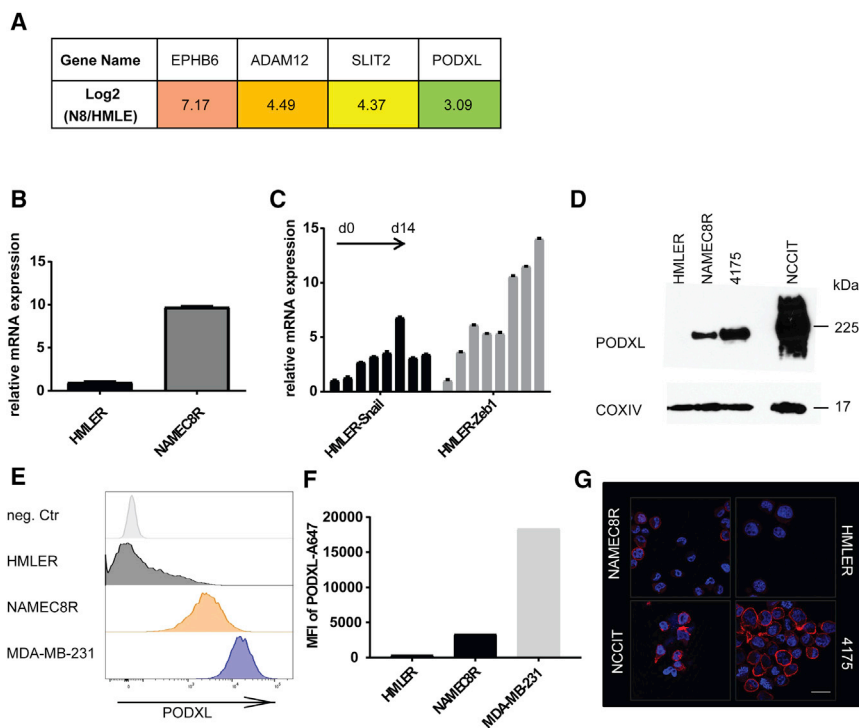

**Figure 2. The Expression of the Cell-Surface Protein Podocalyxin Is Upregulated as a Consequence of EMT**

(A) mRNA expression levels of candidate genes potentially involved in extravasation as determined from mRNA sequencing dataset: *EPHB6*, *ADAM12*, *SLIT2*, and *PODXL*.

(B) qRT-PCR of mRNA levels of *PODXL* in NAMEC8R compared with parental HMLER cells.

(C) qRT-PCR of *PODXL* mRNA levels in HMLER cells induced to undergo an EMT through Dox-inducible expression of Snail or Zeb1 EMT-TFs over a time course of 14 days (2 day intervals).

(D) Western blot analysis of total *PODXL* protein levels in HMLER, NAMEC8R, and 4175 clone of MDA-MB-231 cells in comparison with the human teratoma cell line NCCIT (positive control).

(E) Flow cytometric analysis of *PODXL* cell surface levels on HMLER, NAMEC8R, and MDA-MB-231 breast cancer cell lines.

(F) Quantification of the mean fluorescence intensity (MFI) of *PODXL* cell surface expression.

(G) Immunofluorescent staining of cell surface *PODXL*. Scale bar, 20  $\mu$ m.

See also [Figures S2](#) and [S3](#).

extravasation of breast cancer cells. Accordingly, we used CRISPR/Cas9-mediated knockout (KO) of the *PODXL* gene in both NAMEC8R and 4175 cells ([Figures 3A](#), [S3G](#), and [S3H](#)). KO of *PODXL* in both NAMEC8R and MDA-MB-231 4175 cells reduced their ability to extravasate from *in vitro* endothelial networks by a factor of 2.2-fold over a period of 5 hr (from ~20% to less than 10% of all cancer cells undergoing extravasation; [Figures 3B](#) and [3C](#)). Importantly, this reduction in extravasation efficiency through *PODXL* KO is equal to the previous gain in extravasation efficiency conferred by experimental activation of the EMT program. This reduced extravasation phenotype was completely reversed by forced overexpression of a CRISPR-resistant wild-type (WT) *PODXL* in these cell lines, confirming the importance of *PODXL* for extravasation ([Figures 3B](#) and [3C](#)). Importantly, neither KO of *PODXL* nor overexpression of *PODXL* exerted any effect either on the proliferation of NAMEC8Rs and 4175 cells *in vitro* ([Figures S4A](#) and [S4B](#)) or their EMT status ([Figure S4D](#)). We did observe modest effects on the migration of NAMEC8R and MDA-MB-231 4175 cells following *PODXL* KO, but not on their invasiveness ([Figure S3I](#)).

We also expressed *PODXL* in HMLER cells that did not exhibit preexisting detectable *PODXL* expression ([Figures 3D–3F](#)). The HMLER cells usually show a low baseline of extravasation over a period of 5 hr, usually involving less than 10% of all cells. Overexpression of *PODXL* led to a marked increase (2.8-fold) in the ability of these cells to extravasate from *in vitro* endothelial networks ([Figures 3G](#) and [3H](#)). Furthermore, overexpression of *PODXL* also led to a modest but statistically significant increase (1.3-fold) in extravasation in the *in vivo* chick CAM assay ([Figures 3I](#) and [3J](#)). Importantly, *PODXL* expression did not induce an EMT in the HMLER cells ([Figures S4C](#) and [S4D](#)). Hence, although

*PODXL* operates as an effector of the EMT program, it cannot on its own activate the overall program. We were also able to show that loss of *PODXL* could similarly repress the extravasation of pancreatic cancer cells with a mesenchymal phenotype, specifically cells of the MiaPaca2 and Panc1 pancreatic carcinoma cell lines ([Figures 4A–4D](#) and [S5A–S5C](#)). Therefore, *PODXL* is able to contribute to the extravasation of mesenchymal cells belonging to more than one carcinoma type.

We wished to confirm that these differences in extravasation would also translate into an effect on the rate of experimental metastasis formation. For this purpose, we tested whether KO of *PODXL* would also lead to a decrease in lung metastasis formation by NAMEC8Rs and 4175 cells that had been injected via the tail vein ([Figure 5A](#)). Thus, we introduced via this route NAMEC8R or 4175 cells, both of which co-express a fluorescent marker and luciferase, with or without *PODXL* KO, into the lungs of mice and assessed tumor burden by BLI 4–6 weeks post-injection ([Figures 5B](#) and [5D](#)). We noted that *PODXL* KO had no effect either on the proliferation of these cells *in vitro* or on primary tumor growth *in vivo*, arguing against an effect on their post-extravasation proliferation ([Figures S4A](#), [S4B](#), and [S4E](#)).

In accordance with previous studies ([Lin et al., 2014](#); [Snyder et al., 2015](#)), BLI revealed more than 2-fold and 5-fold decreases in lung metastatic burden in NAMEC8Rs and 4175 cells, respectively, with KO of *PODXL* ([Figures 5B](#) and [5D](#)). The reduction in the BLI signal in the lungs of mice was also confirmed by counting the metastatic nodules ([Figures 5C](#) and [5E](#); see also [Figures S4F](#) and [S4G](#)). Most important, metastasis formation of the 4175 *PODXL* KO cell line could be rescued by re-expression of WT *PODXL* in these cells ([Figure 5E](#)). In light of the fact that *PODXL* KO had no effect on primary tumor growth and thus cell

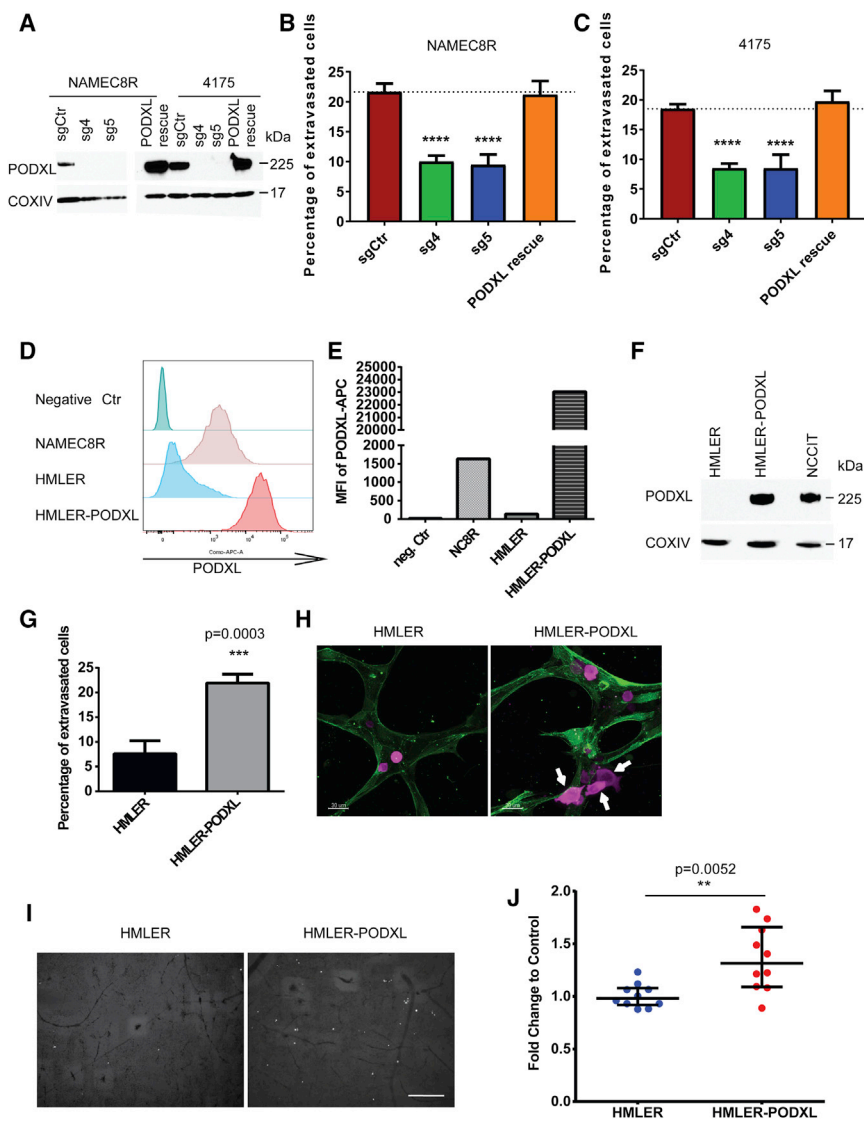

**Figure 3. PODXL Augments the Extravasation of Breast Carcinoma Cells *In Vitro* and *In Vivo***

(A) CRISPR/Cas9-mediated knockout of PODXL using two small guide RNAs in NAMEC8R and the 4175 clone of MDA-MB-231 cells as shown by western blot.

(B and C) KO decreases extravasation efficiency of NAMEC8R (B) and 4175 (C) cells from endothelial networks *in vitro*. Re-expression of WT PODXL (A) in these KO cells is able to rescue the defect in extravasation (B and C). Data were collected from at least three independent experiments, using three devices per condition and experiment. Data are represented as mean  $\pm$  SEM, and statistics were calculated using Student's t test. \*\*\*\*p < 0.0001.

(D) Flow cytometric analysis of PODXL cell surface levels in NAMEC8R, HMLER, and HMLER-PODXL cells.

(E) Quantification of the MFI of PODXL cell surface expression.

(F) Western blot comparing total PODXL protein levels of HMLER, HMLER-PODXL, and NCCIT cells.

(G) Ectopic overexpression of PODXL in HMLER cells increases their extravasation efficiency from endothelial networks *in vitro* (t = 5 hr). Data were collected from three independent experiments, using two or three devices per condition and experiment. Data are represented as mean  $\pm$  SEM, and statistics were calculated using Student's t test.

(H and I) Representative images of HMLER and HMLER-PODXL cells (purple) in the endothelial networks formed by HUVECs expressing LifeAct-GFP (H) after 4 hr *in vitro* (scale bars, 30  $\mu$ m) and (I) after 24 hr in the CAM *in vivo*. Arrows indicate extravasated cancer cells.

(J) Quantification of extravasated HMLER-PODXL cells compared with parental HMLER cells after 24 hr in the CAM. Data were collected from two or three chick eggs per group and five random fields of view per section of CAM. Data are represented as mean  $\pm$  SD, and statistics were calculated using the Mann-Whitney U test. Scale bar, 240  $\mu$ m. See also Figures S3 and S4.

proliferation *in vivo*, we favor the interpretation that the observed effect of metastasis formation was largely, if not entirely, due to an effect on extravasation.

### Functional Importance of Different Domains of PODXL for the Extravasation of Breast Carcinoma Cells

Wishing to elucidate in more detail the molecular mechanism(s) by which PODXL could facilitate extravasation, we used a series of clones expressing mutant versions of the PODXL protein, constructed as reported previously by others (Fernández et al., 2013). Thus, we deleted from the PODXL expression vector the sequences encoding either the extracellular domain (dEC-PODXL), the entire intracellular domain (PODXL-dCD), or the relatively short DTHL signaling motif at the C terminus of the cytoplasmic domain (PODXL-dDTHL). In addition, we created as a control a fusion protein in which the extracellular domain of PODXL was replaced by the completely unrelated EGFR

extracellular domain (EGFR-PODXL). Relevant to later experiments, all of the mutant PODXL clones were constructed to be resistant to constitutively expressed Cas9/sg4. We then expressed these PODXL mutants in the NAMEC8R cells and in the 4175 cells with KO of PODXL (Figures 6A and S6A–S6D).

We proceeded to study the effects of these various PODXL mutants on the extravasation efficiency of NAMEC8R and 4175 cells using the *in vitro* microvascular networks to do so. Interestingly, NAMEC8R and 4175 PODXL KO cells expressing PODXL mutants carrying either a deletion of the entire extracellular domain (dEC-PODXL) or the DTHL signaling motif or expressing an EGFR-PODXL fusion protein regained a rate of extravasation comparable with the level observed with control cells that had not undergone PODXL KO (Figures 6B and 6C). Only expression of the PODXL mutant carrying a deletion of the entire intracellular domain (PODXL-dCD) failed to rescue the effect that loss of PODXL had on the extravasation of NAMEC8R and 4175 cells.

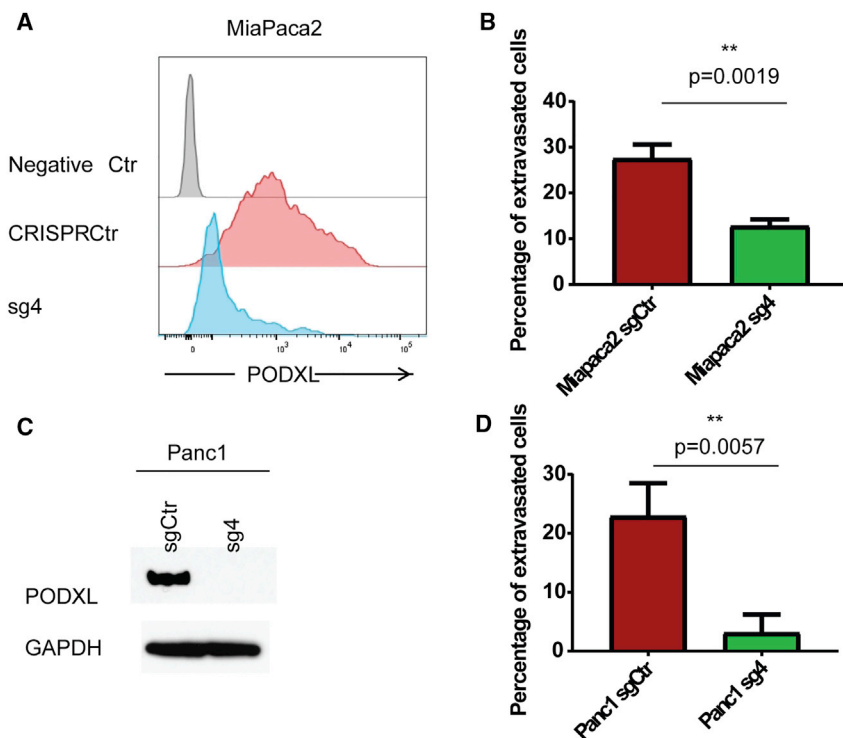

**Figure 4. PODXL Augments the Extravasation of Pancreatic Carcinoma Cells *In Vitro***

(A and B) CRISPR/Cas9-mediated knockout of *PODXL* in MiaPaca2 cells as seen by flow cytometry (A) reduces their extravasation efficiency from endothelial networks *in vitro* (B). Data are represented as mean  $\pm$  SEM. (C and D) CRISPR/Cas9-mediated knockout of *PODXL* in Panc1 cells as seen by western blot (C) reduces their extravasation efficiency from endothelial networks *in vitro*. Data were collected from three independent experiments, using three devices per condition and experiment. Data are represented as mean  $\pm$  SEM (D). All statistics were calculated using Student's t test. See also Figure S5.

This allowed us to conclude that the intracellular domain, but not the C-terminal DTHL signaling motif or the ectodomain, is required for extravasation.

Two types of proteins have been repeatedly shown to directly interact with the cytoplasmic domain of *PODXL*: NHERF1/2 and ezrin (Nielsen and McNagny, 2009; Schmieder et al., 2004; Sizemore et al., 2007). The DTHL signaling motif in the cytoplasmic tail of *PODXL* is required for its interaction with the NHERF1/2 proteins. In contrast, ezrin can interact with *PODXL* both indirectly through NHERF1/2 and directly by binding to the *PODXL* juxtamembrane domain. Interestingly, ezrin has previously been indicated as an important regulator of breast cancer metastasis (Elliott et al., 2005). For this reason, we determined whether loss of ezrin could phenocopy the loss of *PODXL* in the *in vitro* extravasation model. Indeed, knockdown (KD) of ezrin also led to a marked decrease in the extravasation efficiency (1.7- and 3.9-fold) from microvascular networks (Figures 6D and 6E).

We also wished to further confirm that the observed effect on extravasation was indeed mediated through the *PODXL*-ezrin signaling axis. A previous study showed that 95% of the *PODXL*-ezrin physical interaction could be abolished by mutating three amino acids (H-R-S) in the juxtamembrane domain of *PODXL* that are required for direct interaction with ezrin (*PODXL*-HRS/AAA mutant) (Schmieder et al., 2004). Indeed, expression of the *PODXL*-HRS/AAA mutant in *PODXL* KO cells was unable to rescue the defect in extravasation caused by loss of WT *PODXL* (Figures 6B and 6C). Because ezrin is the only protein to date that has been described to directly interact with *PODXL* through this amino acid motif (Schmieder et al., 2004), we concluded that the extravasation of breast cancer cells is determined by a *PODXL*-ezrin signaling axis that is

dependent on the direct binding of ezrin to the juxtamembrane domain of *PODXL*.

**Role of *PODXL* and Ezrin in Dorsal Cortical Polarization during Extravasation**

In the general circulation, individual cancer cells adopt a symmetric, round morphology (Reymond et al., 2013). During extravasation, however, cancer cells must respond to adhesive conditions that impart physical asymmetries, which in turn leads to major rearrangements of the actin cytoskeleton and an uneven, or polarized, distribution of proteins within the cell (Miles et al., 2008; Reymond et al., 2013). Members of the highly homologous ERM protein family, consisting of ezrin, radixin, and moesin, provide linkage between plasma membrane proteins, such as *PODXL*, and the cortical actin cytoskeleton (i.e., the cytoskeleton underlying the plasma membrane); these ERM proteins are therefore key regulators of changes in cell morphology and polarity (Fehon et al., 2010). Indeed, a recent study reported that the ERM protein moesin is necessary for the reorganization of cortical actin during transendothelial migration and invasion in melanoma cells (Estecha et al., 2009). We hypothesized that ezrin, much like moesin, might be important for the cytoskeletal reorganization occurring during extravasation in carcinoma cells.

We therefore set out to visualize the intracellular distribution of ezrin during transendothelial migration through HUVEC monolayers seeded on top of 3D collagen matrices, as described previously (Estecha et al., 2009). For this purpose, we used NAMEC8R cells with or without *PODXL* KO expressing Par1b-Clover. Par1b is a protein kinase that is involved in the establishment and maintenance of cell polarity in various biological contexts and functions antagonistically to the atypical protein kinase C (aPKC)/Par3/Par6 complex (Benton and St Johnston, 2003). The Par1b-Clover was used as a reporter to indicate the establishment of polarity during extravasation. We allowed the carcinoma cells to interact with endothelial cells for 3 hr and then fixed and stained for ezrin. Echoing the results of previous experimental methods that we had used to measure extravasation, NAMEC8R cells with *PODXL* KO were 3-fold less efficient in

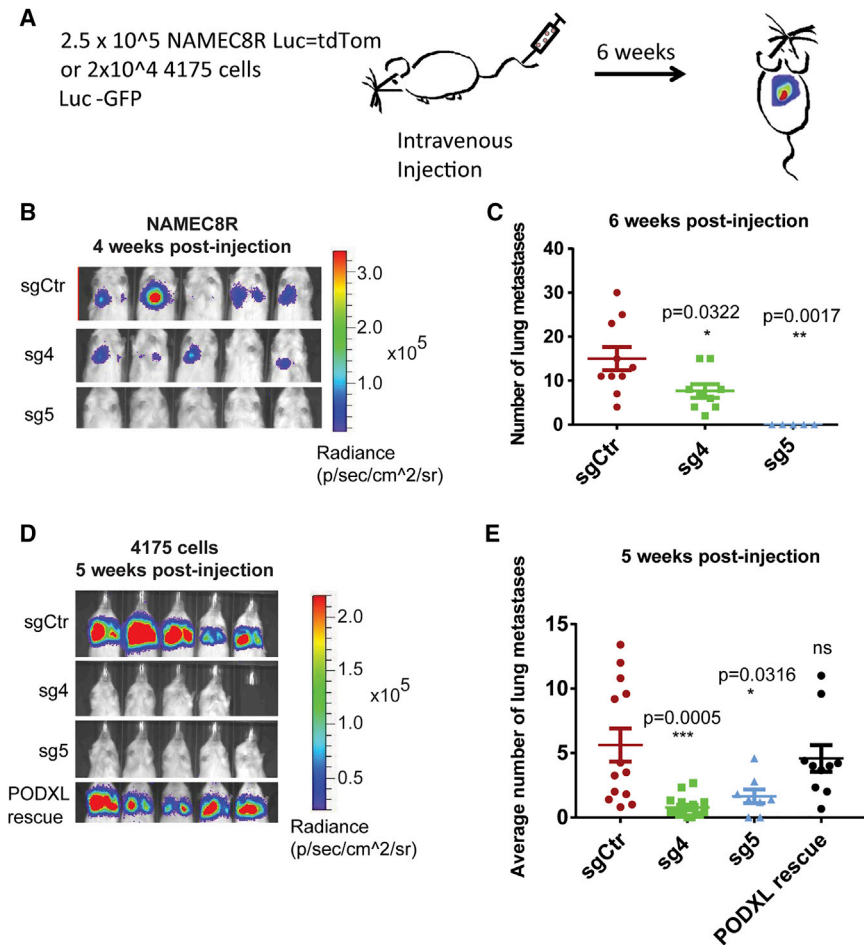

**Figure 5. CRISPR/Cas9-Mediated Knockout of PODXL Reduces the Metastasis Formation of NAMEC8R and 4175 Cells**

(A) Experimental setup.  
(B) Bioluminescent imaging of mice 4 weeks post-tail vein injection of 2.5 × 10<sup>5</sup> NAMEC8R cells sgCtr (control) or sgPODXL (sg4 and sg5) expressing a luciferase-tdTomato fusion gene.  
(C) Quantification of tdTomato-positive NAMEC8R cells 6 weeks post-injection (n = 5–10 mice). Data are represented as mean ± SEM, and statistics were calculated using Student's t test.  
(D) Bioluminescent imaging of mice 5 weeks post-tail vein injection with MDA-MB-231 4175 sgCtr, sgPODXL (sg4 and sg5), or 4175 sg4 cells in which WT PODXL was re-expressed (PODXL rescue). All cells also express GFP and luciferase.  
(E) Quantification of MDA-MB-231 4175 cells from H&E-stained lung sections 5 weeks post-injection (n = 7 or 8 mice). Data are represented as mean ± SEM, and statistics were calculated using Student's t test.  
See also Figure S4.

completing endothelial transmigration than the parental cells in this assay (Figure 6G).

We observed that most of the ezrin protein was redistributed away from the region of adhesion to endothelial cells (ventral side) and instead formed a cap-like structure at the unattached cell cortex (dorsal side) in all extravasating cells examined (Figures 6F and 6H). PODXL was colocalized with ezrin in this cap-like structure (Figure S6E). Additionally, a small proportion of ezrin was present at the very tips of the invasive foot processes at the ventral side. In contrast, Par1b was redistributed to the invasive foot processes of these cells, away from the dorsal cortex and thus in close apposition to the endothelial cells. All carcinoma cells that failed to extravasate remained rounded, and indeed ezrin and Par1b remained evenly distributed around and beneath the plasma membrane of these cells (Figure 6F). This suggests that breast cancer cells use a PODXL-ezrin signaling axis in order to undergo the cytoskeletal rearrangements and cell polarization required for extravasation.

## DISCUSSION

One of the many challenges that disseminated circulating cancer cells must confront in order to successfully serve as founders of

melanoma cells expressing the Twist EMT-TF became more efficient at extravasation in a zebrafish model, doing so through unknown mechanisms (Stoletov et al., 2010).

In the present study, we demonstrate that activation of the EMT program by various EMT-TFs directly regulates the extravasation efficiency and subsequent metastasis of breast carcinoma cells by upregulating the expression of the cell-surface protein PODXL. Another study showing the upregulation of PODXL during EMT in lung cancer cells pointed to the possibility of PODXL induction by EMT in a variety of cancer types without indicating the mechanistic role that this protein played in metastasis formation (Meng et al., 2011). Indeed, we could confirm the EMT-induced upregulation of PODXL in breast cancer cells as well as its high expression levels in more mesenchymal pancreatic cancer cell lines relative to an epithelial pancreatic cancer cell line.

Of note, over the past decade this protein has repeatedly emerged as a predictor of poor prognosis and distant metastasis in many carcinoma types (Laitinen et al., 2015; Larsson et al., 2011; Nielsen and McNagny, 2009; Saukkonen et al., 2015; Somasiri et al., 2004). Nevertheless, its precise mechanisms of action have remained largely elusive. Two studies using short hairpin RNA (shRNA)-mediated KD of PODXL in breast cancer cell lines have demonstrated that it functions as an important



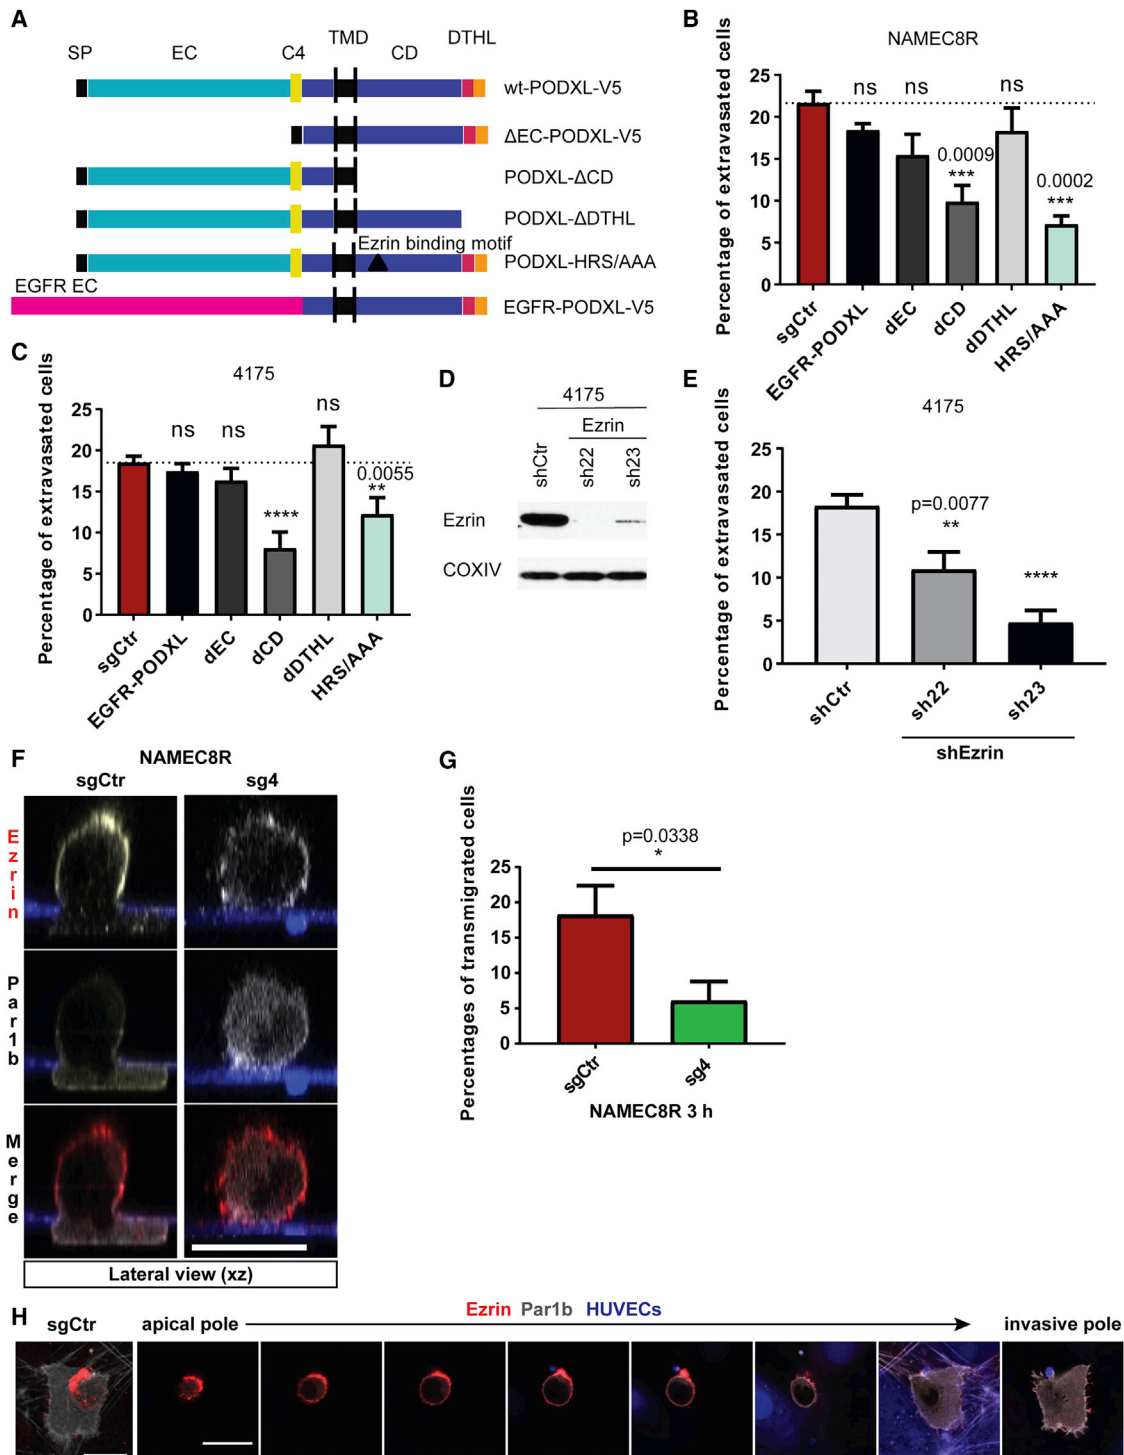

**Figure 6. Interaction of PODXL and Ezrin via the Juxtamembrane Domain of PODXL and Establishment of Cortical Polarization Associated with Extravasation**

(A) Design of PODXL mutants.

(B and C) Extravasation efficiency of cells of the (B) NAMEC8R and (C) 4175 cell lines expressing either WT PODXL or different PODXL mutants. Deletion of the intracellular domain of PODXL (PODXL- $\Delta$ CD) and mutation of the ezrin-binding site (PODXL-HRS/AAA) mimic PODXL KO phenotype. Data were collected from at least three independent experiments, using three devices per condition and experiment.

(D) shRNA-mediated knockdown of ezrin in MDA-MB-231 4175 cells on the protein levels as shown by western blot analysis.

(legend continued on next page)

mediator of metastasis, doing so without revealing the precise steps of the invasion-metastasis cascade that this protein affected (Lin et al., 2014; Snyder et al., 2015). In the present studies of the precise mechanism of action of PODXL, we show that KO of PODXL specifically inhibits the extravasation of breast carcinoma cells, that this correlates with reduced metastasis formation *in vivo*, and that this effect can be rescued by re-expressing WT PODXL.

The extracellular domain of PODXL has been shown to act as a ligand for selectins, including E-selectin expressed by endothelial cells (Dallas et al., 2012; Larrucea et al., 2007). Unexpectedly, we describe the fact that the effect of PODXL on extravasation is not dependent on the heavily glycosylated ectodomain but instead on the direct interaction of its juxtamembrane domain with the ERM protein ezrin, another well-known mediator of metastasis (Elliott et al., 2005; Khanna et al., 2004; Meng et al., 2010); this was demonstrated both by deleting the ectodomain of PODXL and by replacing it with the ectodomain of an unrelated cell-surface protein, that of the EGF receptor. We found this most surprising, because many transmembrane proteins use their extracellular domains to acquire signals from other cells or from the extracellular matrix.

Our study focused on metastasis to the lung, a tissue whose endothelial cells are known to express very low levels of E-selectin, a key ligand of PODXL (Dallas et al., 2012; Strell and Entschladen, 2008). Circulating carcinoma cancer cells may not require E-selectin in order to arrest in the lung tissue, as the luminal diameters of the endothelial capillaries are small and favor physical trapping of cancer cells (Miles et al., 2008; Reymond et al., 2013). As such, it remains to be seen if the mechanism of extravasation we uncovered is unique to the lung or can be extended to other organs.

The extravasation advantage conferred on breast and pancreatic cancer cells by activation of the EMT program was almost entirely eliminated with the loss of PODXL. Nonetheless, we observed relatively low amounts of ~10% absolute extravasation in HMLER cells and carcinoma cells with PODXL KO *in vitro*. This residual extravasation may be explained by alternative mechanisms of extravasation that have been described to date, such as angiopellosis, a mechanism of extravasation that is orchestrated by endothelial cells, by necroptosis, or by other molecules expressed on cancer cells, such as amyloid precursor protein (APP) or angiopoietin-like 4 (ANGPTL4) (Allen et al., 2017; Huang et al., 2011; Kanada et al., 2014; Padua et al., 2008; Strilic et al., 2016). Furthermore, additional cell types, such as natural killer cells, leukocytes, and platelets, can modulate this process *in vivo* by improving cancer cell resistance to shear stress,

protecting cancer cells from the immune system, or increasing cancer cell binding to the endothelium (Reymond et al., 2013). How these factors might affect the extravasation of PODXL-expressing cancer cells remains to be studied.

The PODXL-ezrin interaction, achieved either directly or indirectly via NHERF1/2, has been previously described and suggested to regulate cancer cell traits associated with aggressiveness, such as migration and invasion *in vitro* (Lin et al., 2014; Sizemore et al., 2007). We find that deletion of PODXL as well as disruption of PODXL-ezrin interaction leads to a failure of breast cancer cells to initiate extravasation, which requires extensive cytoskeletal remodeling and the transient establishment of cell polarity (Miles et al., 2008; Reymond et al., 2013). Both PODXL and ezrin have been previously shown to function as polarity proteins that are involved in organizing apical-basal polarity and lumen formation (Orlando et al., 2001; Schmieder et al., 2004). ERM proteins generally play a key role as mediators between transmembrane proteins, such as PODXL, and the F-actin cytoskeleton, and a recent study showed that moesin, an ERM family member, was crucial in mediating invasion and transendothelial migration in melanoma cells *in vitro* by establishing cortical polarization away from the region of cell attachment (Estecha et al., 2009). We find that during extravasation of PODXL-expressing breast cancer cells, the ERM family member ezrin becomes redistributed to a cap-like structure at the dorsal cortex away from the side of attachment to endothelial cells, where it co-localizes with PODXL. In contrast, we observed that cancer cells that had lost PODXL generally failed to redistribute ezrin to a specific location, remained rounded inside the vasculature, and failed to extravasate.

The EMT program has previously been implicated in contributing to completion of many steps of the invasion-metastasis cascade. Here we have uncovered a way in which this program can act during tumor cell dissemination by inducing a PODXL-ezrin signaling axis that enables the dynamic cytoskeletal rearrangements necessary for transendothelial migration.

## EXPERIMENTAL PROCEDURES

### Cell Lines and Cell Culture

HMLER (Elenbaas et al., 2001), NAMEC8R and HMLER-Snail (Tam et al., 2013), HMLER-Zeb1 (Pattabiraman et al., 2016) and LM2-MDA-MB-231 (clone 4175; Minn et al., 2005), NCCIT (cells were a gift from CureMeta), BxPC3, MiaPaca2, and Panc1 cells were used in this study. BxPC3 and MiaPaca2 cells were a gift from R. Hynes. Panc1 cells were obtained from the American Type Culture Collection (ATCC). HMLER cells and their derivatives were maintained in MEGM media as previously described (Elenbaas et al., 2001). Clone 4175 cells and pancreatic cell lines were maintained in DME with 10% fetal bovine

(E) Knockdown of ezrin reduces the extravasation efficiency of 4175 cells from microvascular networks *in vitro*. Data were collected from three independent experiments, using two or three devices per condition and experiment.

(F) Distribution of ezrin (red) and Par1b-Clover (gray) in NAMEC8R sgCtr cell during transendothelial-collagen invasion or in rounded NAMEC8R cell with PODXL KO (sg4) at  $t = 3$  hr as shown in lateral view (xz plane). Endothelial monolayer formed by HUVEC expressing mAzurite (blue) on top of 100- $\mu$ m-thick collagen I gels. Scale bar, 20  $\mu$ m.

(G) Quantification of endothelial transmigration of NAMEC8R sgCtr compared with sg4 cells in six independent experiments.

(H) NAMEC8R sgCtr cell transmigrating through HUVEC monolayer (blue) into 3D collagen gel. The cell expresses Par1b Clover (gray) and was stained for ezrin (red). The top view (left, 3D projection; scale bar, 15  $\mu$ m) and a gallery of single xy sections taken at 2.4  $\mu$ m intervals from the apical to the invasive pole. Scale bar, 20  $\mu$ m.

All data are represented as mean  $\pm$  SEM, and statistics were calculated using Student's *t* test. \*\*\*\* $p < 0.0001$ . See also Figure S6.

serum (FBS). NCCIT cells were cultured in RPMI-1640 (30-2001; ATCC) with 10% FBS and 5% penicillin/streptomycin (Pen/Strep). For all experiments, HMLER cells were sorted to guarantee purity of the epithelial CD44<sup>lo</sup>/CD24<sup>hi</sup>/EpCAM<sup>hi</sup> population. All cells were regularly tested for mycoplasma but have not been authenticated since first acquisition.

### Microfluidic Networks for Extravasation Assays

All extravasation assays in microvascular networks *in vitro* were prepared and seeded according to a published protocol (Chen et al., 2017). Cancer cells were prepared at a concentration of  $5 \times 10^5$  cells/mL in EGM-2, and 40–50  $\mu$ L was perfused into each network. Subsequently, microfluidic devices were incubated for 5 hr at 37°C under static conditions, with 5% CO<sub>2</sub> and then fixed using 4% paraformaldehyde (PFA). Extravasated cells were quantified using an Olympus FV1000 confocal microscope. Multiple z stacks were acquired at 20 $\times$  magnification at different locations (for live imaging every 30 min for 3.5 hr), and images were analyzed using Imaris software (Bitplane).

### Cancer Cell Migration through HUVEC Monolayers Cultured on Collagen I Gels

Collagen gel matrices were prepared as previously described (Artym and Matsumoto, 2010). Subsequently, HUVEC-Azurite were seeded on top of the polymerized collagen gels in 200  $\mu$ L EGM-2 ( $2 \times 10^6$  cells/mL) and grown to confluence before cancer cells were seeded sparsely ( $0.5 \times 10^5$  cell/well) on top of the monolayers. Z stacks were obtained at multiple positions (two or three) at 63 $\times$  magnification per imaged sample using an LSM710 confocal microscope (Zeiss) and analyzed using Imaris software.

### CAM Assay

In order to study the extravasation of cancer cells *in vivo*, the CAM of the chick embryo was used as described previously (Palmer et al., 2011). In brief,  $1 \times 10^5$  cancer cells per chick were directly injected into the allantoic vein, and the eggs were incubated for 24 hr. Three sections of CAM with a 1 cm radius were harvested per chick embryo. Extravasated cells were imaged using a Zeiss Lumar Stereoscope at 50 $\times$ . Per experimental group, two or three chicks were analyzed. Five random fields of view were imaged per section of CAM. The number of extravasated cancer cells per field was quantified using ImageJ (NIH).

### Cancer Cell Injection into Mice

Animal studies were conducted following the MIT Committee on Animal Care protocol (protocol number 1017-097-20). For primary tumor formation,  $2 \times 10^5$  4175 cells or  $5 \times 10^5$  NAMEC8R cells in 20% Matrigel/PBS were injected into the mammary fat pad of 8-week-old female Nod/Scid and NSG mice, respectively.

For experimental lung metastasis,  $2 \times 10^4$  4175 cells or  $2.5 \times 10^5$  NAMEC8R/HMLER cells were injected via tail vein into 8-week-old male Nod/Scid and NSG mice, respectively. Lung metastases were monitored via bioluminescence in live animals using the IVIS Spectrum *in vivo* imaging system. Images were analyzed using Living Image software (PerkinElmer).

The lungs of NSG mice injected with HMLER or NAMEC8R cells were also checked for metastases using the MZ12 Stereomicroscope (Leica). Metastases were quantified by counting tdTomato-fluorescent tumor nodules (HMLER/NAMEC8R) or by H&E staining (4175). For higher accuracy, five H&E sections in 50  $\mu$ m increments were quantified for each mouse and averaged.

### Statistical Analysis

All statistics were calculated using GraphPad Prism, either using the Mann-Whitney U test or Student's t test as detailed in the figure legends.

### DATA AND SOFTWARE AVAILABILITY

For the identification of cell-surface proteins differentially expressed in cells prior to and after an EMT, a previously published mRNA sequencing dataset was analyzed (Pattabiraman et al., 2016). The accession number for the RNA-seq data reported in this paper is GEO: GSE74883.

### SUPPLEMENTAL INFORMATION

Supplemental Information includes Supplemental Experimental Procedures, six figures, and two videos and can be found with this article online at <https://doi.org/10.1016/j.celrep.2018.06.092>.

### ACKNOWLEDGMENTS

We would like to thank A. Lambert, T. Shibue, W. Henry, and J. Krall for their critical review of the manuscript; P. Thiru from BARC for his help with the bioinformatic analyses; CureMeta for PODXL antibodies; A. McClatchey for discussions; B. Bierie, C. Kroeger, Z. Maimaiti, V. Liu, K. Xu, and T. Shibue for experimental assistance; the whole Weinberg laboratory for discussions and reagents; the Whitehead Institute microscope and flow cytometry core facilities; and the Koch Institute small animal imaging core and histology core facility. R.A.W. is an American Cancer Society Research Professor and a Daniel K. Ludwig Cancer Research Professor. J.F., F.R., and R.A.W. received support from the NIH (grant R01 CA078461) and CureMeta. M.B.C., C.H., and R.D.K. were supported by the National Cancer Institute (grant U01 CA202177). A.Z. was supported by NIH/NCI grant R01CA218526. K.E.H. was supported by the Microenvironmental Influences in Cancer Training Program (NIH/NCIT32CA009592) and NIH/NCI grant 5F31CA189764-03.

### AUTHOR CONTRIBUTIONS

Conceptualization, J.F. and R.A.W.; Methodology, J.F., M.B.C., K.E.H., and C.H.; Investigation, J.F., F.R., M.B.C., K.E.H., and C.H.; Formal Analysis and Validation, J.F., M.B.C., K.E.H., and C.H.; Resources, R.A.W., R.D.K., and A.Z.; Writing – Original Draft, J.F.; Writing – Review & Editing, R.A.W., A.Z., and R.D.K.; Project Administration, J.F.; Supervision, R.A.W.

### DECLARATION OF INTERESTS

R.D.K. is a founder of AIM Biotech and a member of its board.

Received: February 28, 2018

Revised: May 29, 2018

Accepted: June 21, 2018

Published: July 24, 2018

### REFERENCES

- Allen, T.A., Gracieux, D., Talib, M., Tokarz, D.A., Hensley, M.T., Cores, J., Vandergriff, A., Tang, J., de Andrade, J.B., Dinh, P.U., et al. (2017). Angiogenesis as an alternative mechanism of cell extravasation. *Stem Cells* 35, 170–180.
- Artym, V.V., and Matsumoto, K. (2010). Imaging cells in three-dimensional collagen matrix. *Curr. Protoc. Cell Biol. Chapter 10*, Unit 10.18.1–20.
- Benton, R., and St Johnston, D. (2003). Drosophila PAR-1 and 14-3-3 inhibit Bazooka/PAR-3 to establish complementary cortical domains in polarized cells. *Cell* 115, 691–704.
- Boyer, B., and Thiery, J.P. (1993). Epithelium-mesenchyme interconversion as example of epithelial plasticity. *APMIS* 101, 257–268.
- Chen, M.B., Whisler, J.A., Jeon, J.S., and Kamm, R.D. (2013). Mechanisms of tumor cell extravasation in an *in vitro* microvascular network platform. *Integr. Biol. (Camb.)* 5, 1262–1271.
- Chen, M.B., Whisler, J.A., Fröse, J., Yu, C., Shin, Y., and Kamm, R.D. (2017). On-chip human microvasculature assay for visualization and quantification of tumor cell extravasation dynamics. *Nat. Protoc.* 12, 865–880.
- Dallas, M.R., Chen, S.H., Streppel, M.M., Sharma, S., Maitra, A., and Konstantopoulos, K. (2012). Sialofucosylated podocalyxin is a functional E- and L-selectin ligand expressed by metastatic pancreatic cancer cells. *Am. J. Physiol. Cell Physiol.* 303, C616–C624.
- De Cock, J.M., Shibue, T., Dongre, A., Keckesova, Z., Reinhardt, F., and Weinberg, R.A. (2016). Inflammation triggers Zeb1-dependent escape from tumor latency. *Cancer Res.* 76, 6778–6784.

- Elenbaas, B., Spirio, L., Koerner, F., Fleming, M.D., Zimonjic, D.B., Donaher, J.L., Popescu, N.C., Hahn, W.C., and Weinberg, R.A. (2001). Human breast cancer cells generated by oncogenic transformation of primary mammary epithelial cells. *Genes Dev.* *15*, 50–65.
- Elliott, B.E., Meens, J.A., SenGupta, S.K., Louvard, D., and Arpin, M. (2005). The membrane cytoskeletal crosslinker ezrin is required for metastasis of breast carcinoma cells. *Breast Cancer Res.* *7*, R365–R373.
- Estecha, A., Sánchez-Martín, L., Puig-Kröger, A., Bartolomé, R.A., Teixidó, J., Samaniego, R., and Sánchez-Mateos, P. (2009). Moesin orchestrates cortical polarity of melanoma tumour cells to initiate 3D invasion. *J. Cell Sci.* *122*, 3492–3501.
- Fehon, R.G., McClatchey, A.I., and Bretscher, A. (2010). Organizing the cell cortex: the role of ERM proteins. *Nat. Rev. Mol. Cell Biol.* *11*, 276–287.
- Fernández, D., Horrillo, A., Alquezar, C., González-Manchón, C., Parrilla, R., and Ayuso, M.S. (2013). Control of cell adhesion and migration by podocalyxin. Implication of Rac1 and Cdc42. *Biochem. Biophys. Res. Commun.* *432*, 302–307.
- Fidler, I.J. (2002). The organ microenvironment and cancer metastasis. *Differentiation* *70*, 498–505.
- Huang, R.L., Teo, Z., Chong, H.C., Zhu, P., Tan, M.J., Tan, C.K., Lam, C.R., Sng, M.K., Leong, D.T., Tan, S.M., et al. (2011). ANGPTL4 modulates vascular junction integrity by integrin signaling and disruption of intercellular VE-cadherin and claudin-5 clusters. *Blood* *118*, 3990–4002.
- Kanada, M., Zhang, J., Yan, L., Sakurai, T., and Terakawa, S. (2014). Endothelial cell-initiated extravasation of cancer cells visualized in zebrafish. *PeerJ* *2*, e688.
- Kao, J., Salari, K., Bocanegra, M., Choi, Y.L., Girard, L., Gandhi, J., Kwei, K.A., Hernandez-Boussard, T., Wang, P., Gazdar, A.F., et al. (2009). Molecular profiling of breast cancer cell lines defines relevant tumor models and provides a resource for cancer gene discovery. *PLoS ONE* *4*, e6146.
- Khanna, C., Wan, X., Bose, S., Cassaday, R., Olomu, O., Mendoza, A., Yeung, C., Gorlick, R., Hewitt, S.M., and Helman, L.J. (2004). The membrane-cytoskeleton linker ezrin is necessary for osteosarcoma metastasis. *Nat. Med.* *10*, 182–186.
- Labelle, M., Begum, S., and Hynes, R.O. (2011). Direct signaling between platelets and cancer cells induces an epithelial-mesenchymal-like transition and promotes metastasis. *Cancer Cell* *20*, 576–590.
- Laitinen, A., Böckelman, C., Hagström, J., Kokkola, A., Fermér, C., Nilsson, O., and Haglund, C. (2015). Podocalyxin as a prognostic marker in gastric cancer. *PLoS ONE* *10*, e0145079.
- Lambert, A.W., Pattabiraman, D.R., and Weinberg, R.A. (2017). Emerging biological principles of metastasis. *Cell* *168*, 670–691.
- Larrucea, S., Butta, N., Rodriguez, R.B., Alonso-Martin, S., Arias-Salgado, E.G., Ayuso, M.S., and Parrilla, R. (2007). Podocalyxin enhances the adherence of cells to platelets. *Cell. Mol. Life Sci.* *64*, 2965–2974.
- Larsson, A., Johansson, M.E., Wangefjord, S., Gaber, A., Nodin, B., Kucharzewska, P., Welinder, C., Belting, M., Eberhard, J., Johansson, A., et al. (2011). Overexpression of podocalyxin-like protein is an independent factor of poor prognosis in colorectal cancer. *Br. J. Cancer* *105*, 666–672.
- Lin, C.W., Sun, M.S., Liao, M.Y., Chung, C.H., Chi, Y.H., Chiou, L.T., Yu, J., Lou, K.L., and Wu, H.C. (2014). Podocalyxin-like 1 promotes invadopodia formation and metastasis through activation of Rac1/Cdc42/cortactin signaling in breast cancer cells. *Carcinogenesis* *35*, 2425–2435.
- Mani, S.A., Guo, W., Liao, M.J., Eaton, E.N., Ayyanan, A., Zhou, A.Y., Brooks, M., Reinhard, F., Zhang, C.C., Shiptsin, M., et al. (2008). The epithelial-mesenchymal transition generates cells with properties of stem cells. *Cell* *133*, 704–715.
- Meng, Y., Lu, Z., Yu, S., Zhang, Q., Ma, Y., and Chen, J. (2010). Ezrin promotes invasion and metastasis of pancreatic cancer cells. *J. Transl. Med.* *8*, 61.
- Meng, X., Ezziati, P., and Wilkins, J.A. (2011). Requirement of podocalyxin in TGF- $\beta$  induced epithelial mesenchymal transition. *PLoS ONE* *6*, e18715.
- Miles, F.L., Pruitt, F.L., van Golen, K.L., and Cooper, C.R. (2008). Stepping out of the flow: capillary extravasation in cancer metastasis. *Clin. Exp. Metastasis* *25*, 305–324.
- Minn, A.J., Gupta, G.P., Siegel, P.M., Bos, P.D., Shu, W., Giri, D.D., Viale, A., Olshen, A.B., Gerald, W.L., and Massagué, J. (2005). Genes that mediate breast cancer metastasis to lung. *Nature* *436*, 518–524.
- Nielsen, J.S., and McNagny, K.M. (2009). The role of podocalyxin in health and disease. *J. Am. Soc. Nephrol.* *20*, 1669–1676.
- Orlando, R.A., Takeda, T., Zak, B., Schmieder, S., Benoit, V.M., McQuistan, T., Furthmayr, H., and Farquhar, M.G. (2001). The glomerular epithelial cell anti-adhesin podocalyxin associates with the actin cytoskeleton through interactions with ezrin. *J. Am. Soc. Nephrol.* *12*, 1589–1598.
- Padua, D., Zhang, X.H., Wang, Q., Nadal, C., Gerald, W.L., Gomis, R.R., and Massagué, J. (2008). TGF $\beta$  primes breast tumors for lung metastasis seeding through angiopoietin-like 4. *Cell* *133*, 66–77.
- Palmer, T.D., Lewis, J., and Zijlstra, A. (2011). Quantitative analysis of cancer metastasis using an avian embryo model. *J. Vis. Exp.* (51), 2815.
- Pattabiraman, D.R., Bierie, B., Kober, K.I., Thiru, P., Krall, J.A., Zill, C., Reinhardt, F., Tam, W.L., and Weinberg, R.A. (2016). Activation of PKA leads to mesenchymal-to-epithelial transition and loss of tumor-initiating ability. *Science* *351*, aad3680.
- Reymond, N., d'Água, B.B., and Ridley, A.J. (2013). Crossing the endothelial barrier during metastasis. *Nat. Rev. Cancer* *13*, 858–870.
- Sarrió, D., Rodríguez-Pinilla, S.M., Hardisson, D., Cano, A., Moreno-Bueno, G., and Palacios, J. (2008). Epithelial-mesenchymal transition in breast cancer relates to the basal-like phenotype. *Cancer Res.* *68*, 989–997.
- Saukkonen, K., Hagström, J., Mustonen, H., Juuti, A., Nordling, S., Fermér, C., Nilsson, O., Seppänen, H., and Haglund, C. (2015). Podocalyxin is a marker of poor prognosis in pancreatic ductal adenocarcinoma. *PLoS ONE* *10*, e0129012.
- Schmieder, S., Nagai, M., Orlando, R.A., Takeda, T., and Farquhar, M.G. (2004). Podocalyxin activates RhoA and induces actin reorganization through NHERF1 and Ezrin in MDCK cells. *J. Am. Soc. Nephrol.* *15*, 2289–2298.
- Shibue, T., Brooks, M.W., and Weinberg, R.A. (2013). An integrin-linked machinery of cytoskeletal regulation that enables experimental tumor initiation and metastatic colonization. *Cancer Cell* *24*, 481–498.
- Sizemore, S., Cicek, M., Sizemore, N., Ng, K.P., and Casey, G. (2007). Podocalyxin increases the aggressive phenotype of breast and prostate cancer cells in vitro through its interaction with ezrin. *Cancer Res.* *67*, 6183–6191.
- Snyder, K.A., Hughes, M.R., Hedberg, B., Brandon, J., Hernaez, D.C., Bergqvist, P., Cruz, F., Po, K., Graves, M.L., Turvey, M.E., et al. (2015). Podocalyxin enhances breast tumor growth and metastasis and is a target for monoclonal antibody therapy. *Breast Cancer Res.* *17*, 46.
- Somasiri, A., Nielsen, J.S., Makretsov, N., McCoy, M.L., Prentice, L., Gilks, C.B., Chia, S.K., Gelmon, K.A., Kershaw, D.B., Huntsman, D.G., et al. (2004). Overexpression of the anti-adhesin podocalyxin is an independent predictor of breast cancer progression. *Cancer Res.* *64*, 5068–5073.
- Stoletov, K., Kato, H., Zardoujian, E., Kelber, J., Yang, J., Shattil, S., and Klemke, R. (2010). Visualizing extravasation dynamics of metastatic tumor cells. *J. Cell Sci.* *123*, 2332–2341.
- Strell, C., and Entschladen, F. (2008). Extravasation of leukocytes in comparison to tumor cells. *Cell Commun. Signal.* *6*, 10.
- Strlic, B., Yang, L., Albarrán-Juárez, J., Wachsmuth, L., Han, K., Müller, U.C., Pasparakis, M., and Offermanns, S. (2016). Tumour-cell-induced endothelial cell necroptosis via death receptor 6 promotes metastasis. *Nature* *536*, 215–218.
- Tam, W.L., Lu, H., Buikhuisen, J., Soh, B.S., Lim, E., Reinhardt, F., Wu, Z.J., Krall, J.A., Bierie, B., Guo, W., et al. (2013). Protein kinase C  $\alpha$  is a central signaling node and therapeutic target for breast cancer stem cells. *Cancer Cell* *24*, 347–364.
- Thiery, J.P., Acloque, H., Huang, R.Y., and Nieto, M.A. (2009). Epithelial-mesenchymal transitions in development and disease. *Cell* *139*, 871–890.
- Yadavalli, S., Jayaram, S., Manda, S.S., Madugundu, A.K., Nayakanti, D.S., Tan, T.Z., Bhat, R., Rangarajan, A., Chatterjee, A., Gowda, H., et al. (2017). Data-Driven Discovery of Extravasation Pathway in Circulating Tumor Cells. *Sci. Rep.* *7*, 43710.

**Cell Reports, Volume 24**

**Supplemental Information**

**Epithelial-Mesenchymal Transition**

**Induces Podocalyxin to Promote**

**Extravasation via Ezrin Signaling**

**Julia Fröse, Michelle B. Chen, Katie E. Hebron, Ferenc Reinhardt, Cynthia Hajal, Andries Zijlstra, Roger D. Kamm, and Robert A. Weinberg**

## Figures S1-S6

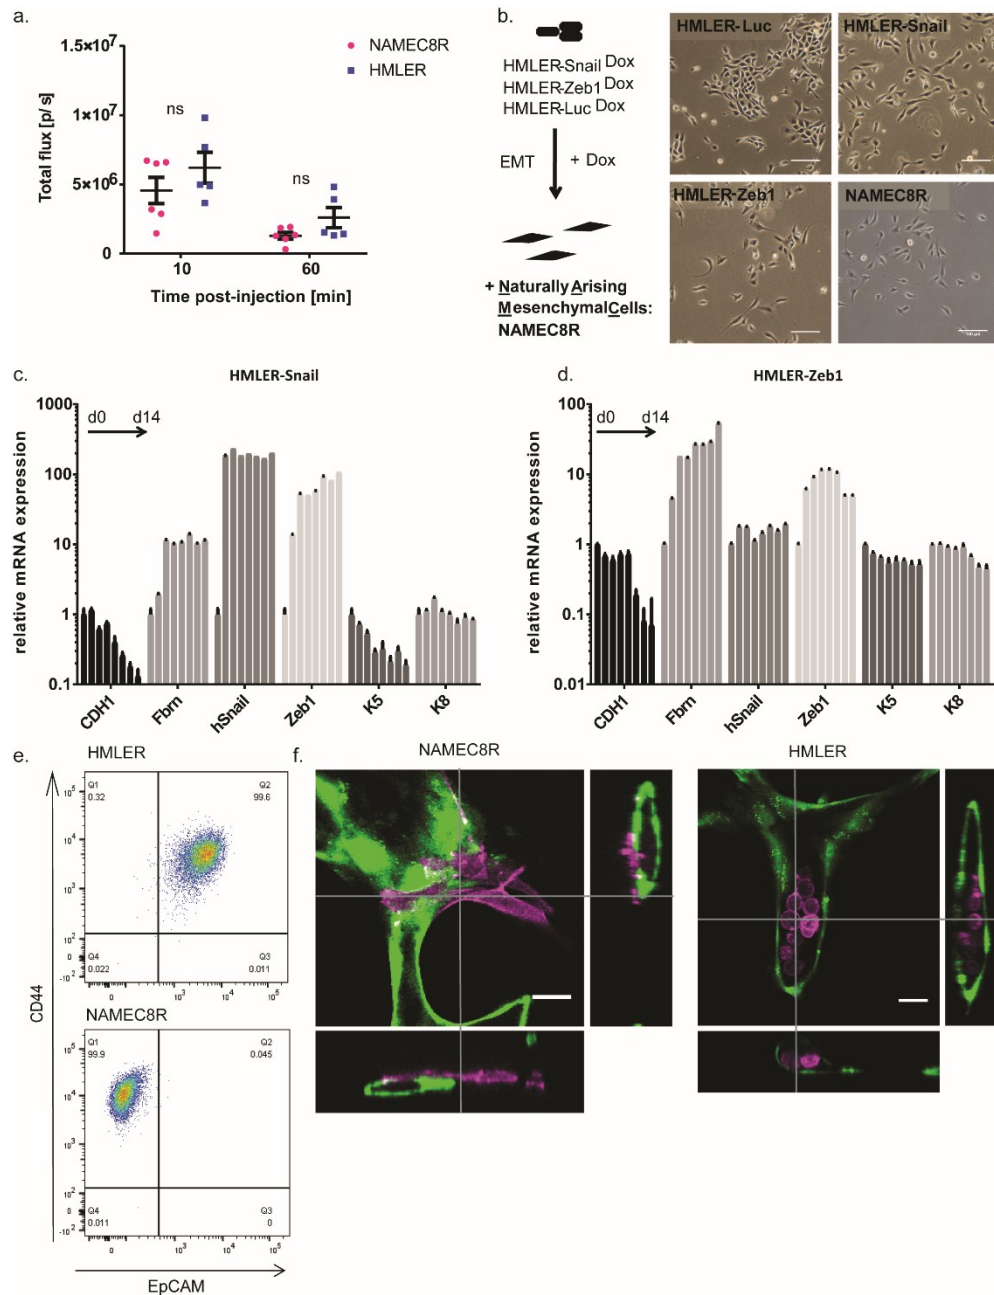

**Figure S1: Extended characterization of breast cancer cell lines. Related to Figure 1.** (a) Bioluminescent imaging of mice 10 or 60 min after injection with NAMEC8R or HMLER cells expressing a luciferase-tdTomato fusion gene shows no significant differences in cell numbers in lungs of mice.  $n=5-6$ . Data are represented as mean  $\pm$  SEM. (b) EMT induction in HMLER cells *in vitro*. Left: HMLER cells were forced to undergo an EMT by dox-inducible overexpression of either Snail or Zeb1 EMT-TF. Dox-inducible expression of *Renilla* luciferase served as a negative control and NAMEC8R cells as a positive control. Right: representative bright-field images of HMLER-Luc, -Snail, -Zeb1 cells treated with dox for 14 d in comparison to mesenchymal NAMEC8R cells. Scalebars: 100  $\mu$ m. (c,d) mRNA expression of EMT markers in HMLER-Snail (c) and HMLER-Zeb1 (d) cells throughout a 14 d treatment with dox *in vitro* (2d time intervals). (e) Flow cytometric analysis comparing CD44 and EpCAM levels on HMLER and NAMEC8R cells. (f) Orthogonal views of NAMEC8R and HMLER cells (purple) extravasated from or stuck in microvascular networks (green) *in vitro* (t=4h). Scalebars: 30  $\mu$ m.

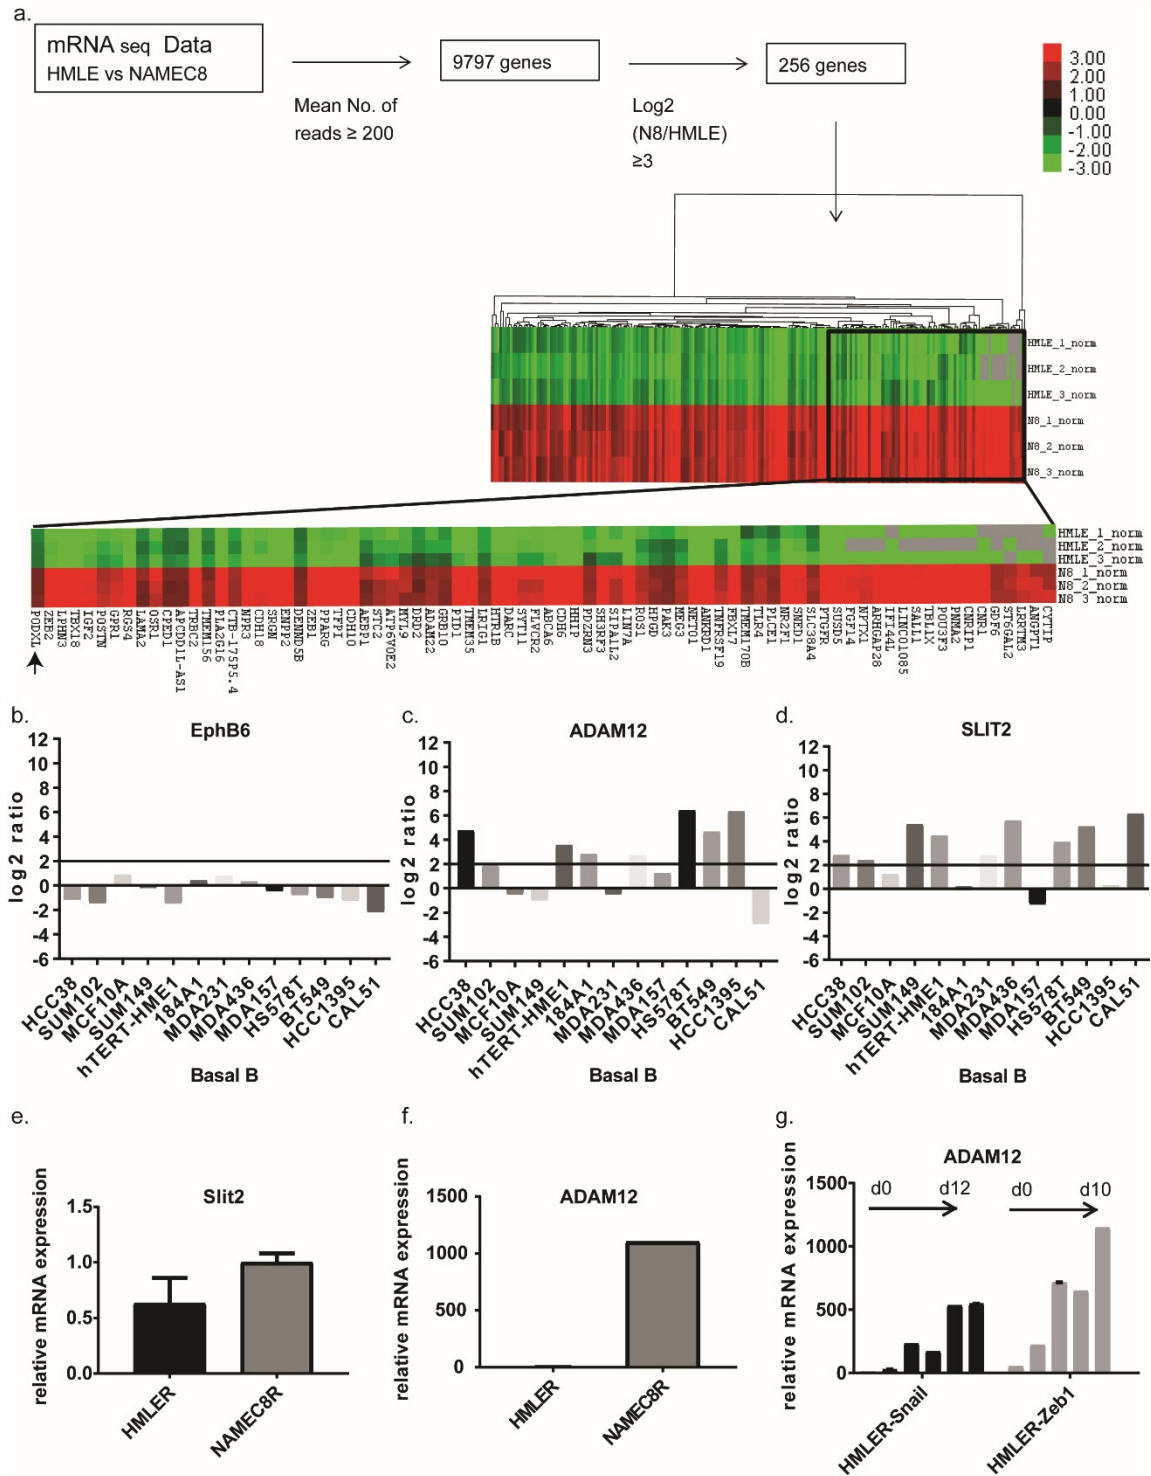

**Figure S2: Candidate selection. Related to Figure 2.** (a) Schematic of analysis of published gene expression data set comparing NAMEC8 and HMLE cells (Pattabiraman et al., 2016). Clustering performed with Cluster 3.0 and visualized using Java TreeView. Arrow shows *PODXL*. (b-d) mRNA expression of *EPHB6* (b) and *ADAM12* (c) and *SLIT2* (d) in breast cancer cell lines of the basal B subtype (Kao et al., 2009). (e, f) mRNA expression of *SLIT2* (e) and *ADAM12* (f) in NAMEC8R compared to HMLER cells. (g) Expression of *ADAM12* mRNA in HMLER cells induced to undergo an EMT through Dox-inducible expression of Snail or Zeb1 EMT-TFs over a time course of 10-12 days (monitored at 2-day intervals). Normalized to Day 0.

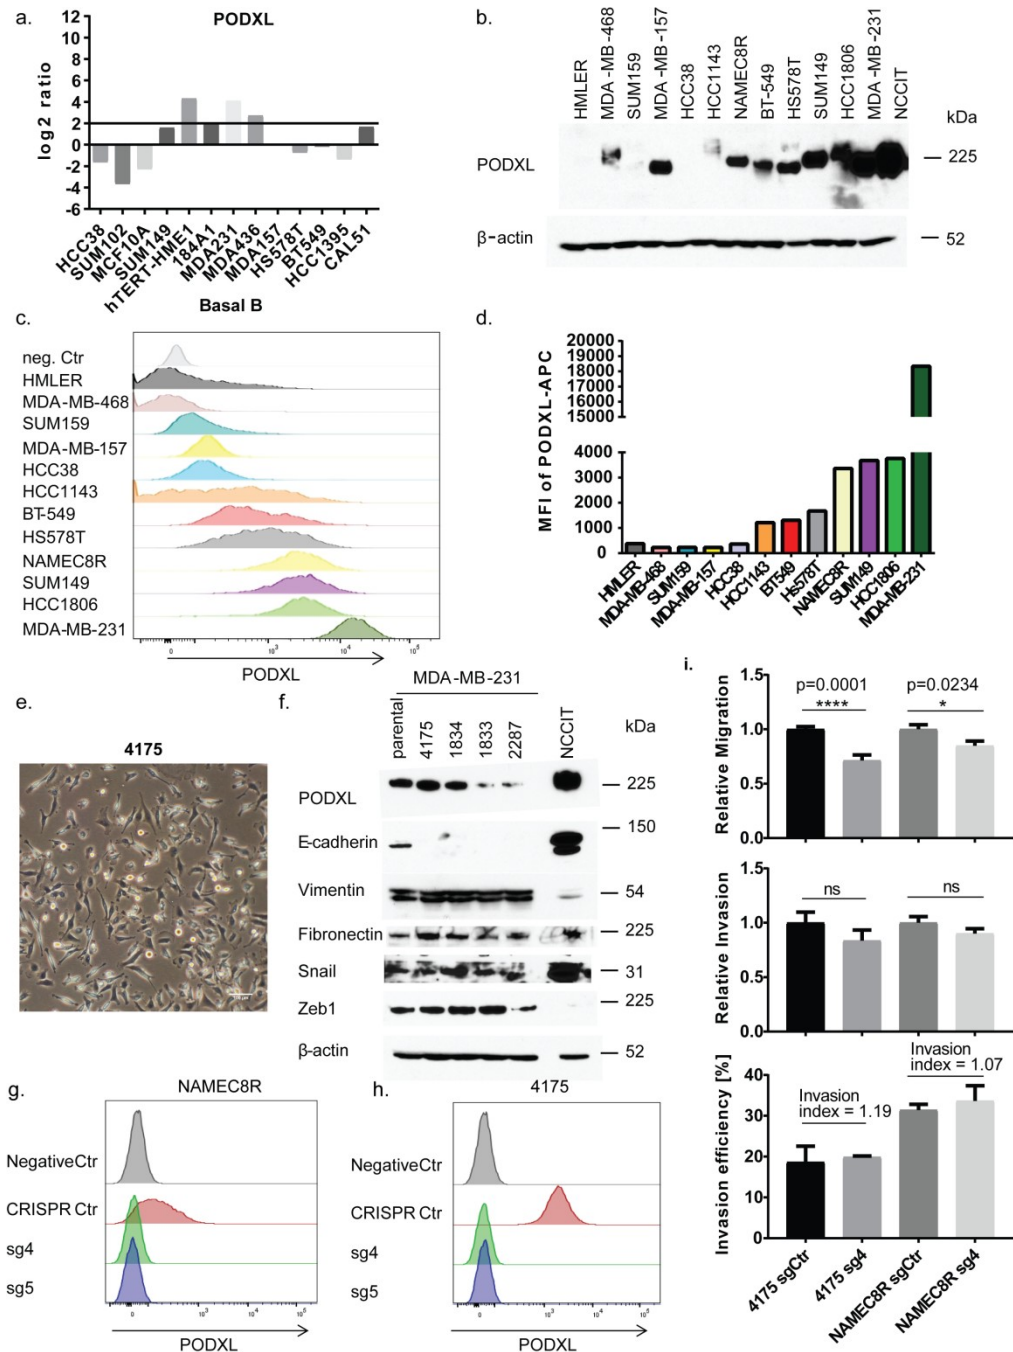

**Figure S3: *PODXL* mRNA and protein expression in basal breast cancer cell lines. Related to Figure 2 and 3.** (a) mRNA expression of *PODXL* in breast cancer cell lines of the basal B subtype (Kao et al., 2009). (b-d) *PODXL* protein levels in a panel of breast cancer cell lines as determined by Western blot analysis (b) and flow cytometry (c, d). The MFI (mean fluorescence intensity) of *PODXL* was quantified for each cell line (d). (e) Bright-field image showing the mesenchymal morphology of the 4175 clone of the MDA-MB-231 cell line. Scale bar: 100 μm. (f) Protein expression of *PODXL* and EMT markers in different clones of the MDA-MB-231 cell line. (g, h) Flow cytometric analysis of CRISPR/Cas9-mediated KO of *PODXL* using two different guide RNAs in NAMEC8R (g) and MDA-MB-231 4175 (h) cells compared to cells expressing a control guide RNA. (i) Migration (top) and invasion (middle) analysis of NAMEC8R and 4175 cell with or without *PODXL* KO over a time period of 24 h. The bottom panel shows the invasion efficiency (invasion relative to migration). Representative data of three biological replicates. Data are represented as mean ± SEM (n=6) and all statistics were calculated using student's t-test.



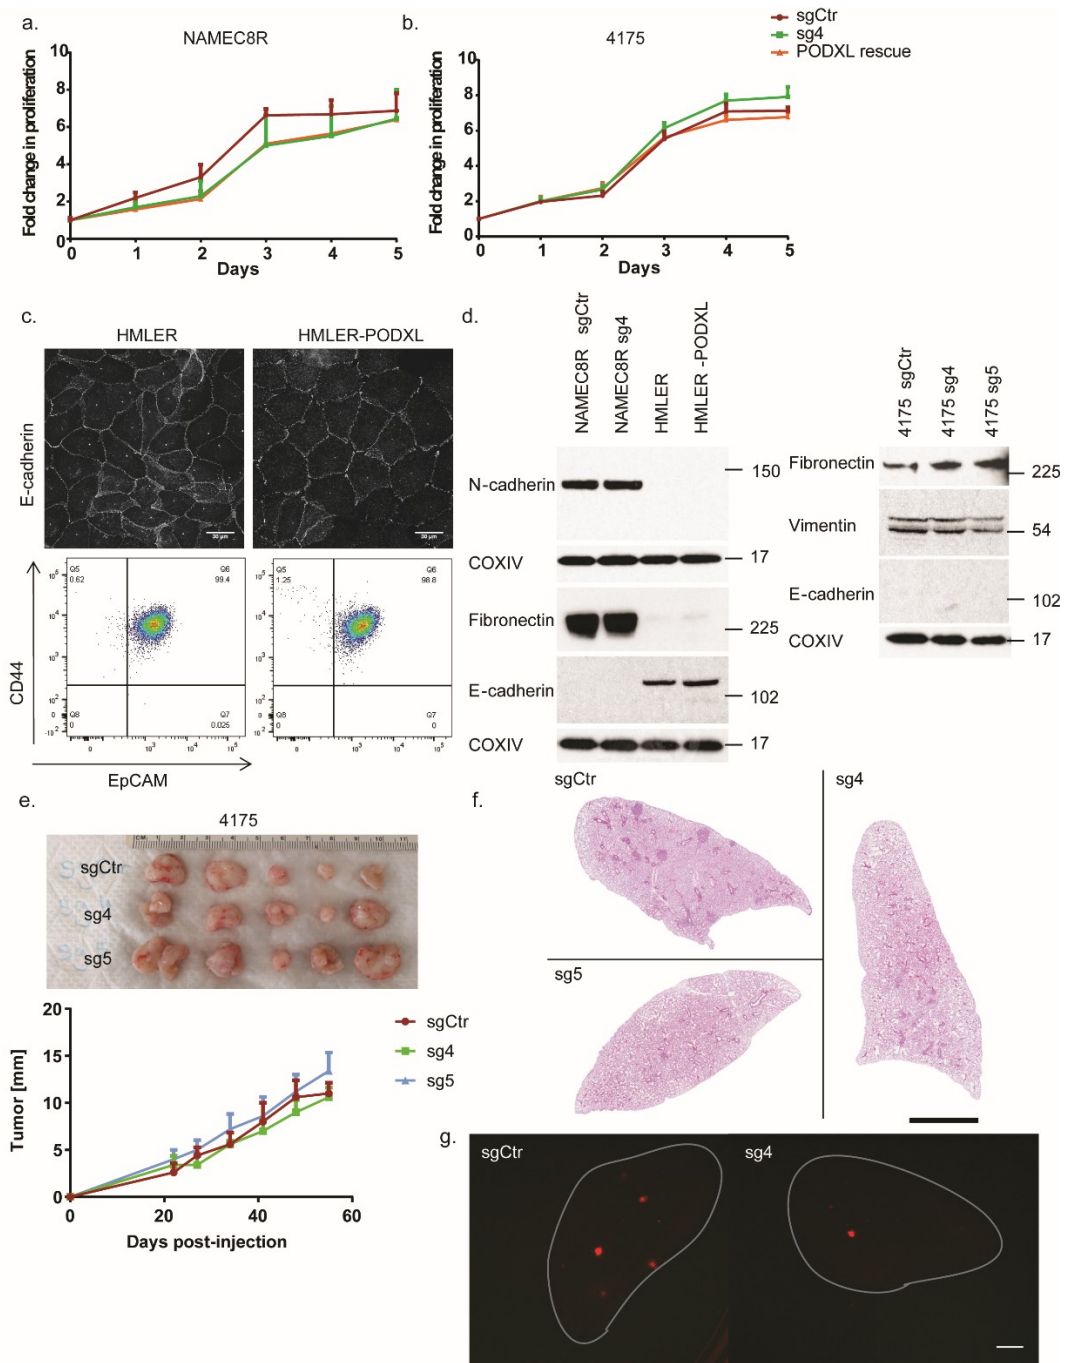

**Figure S4: PODXL KO and overexpression in breast cancer cell lines. Related to Figure 3 and 5.** (a, b) Proliferation of NAMEC8R (a) and 4175 (b) control cells compared to *PODXL* KO cells and KO cells re-expressing wt *PODXL* (*PODXL* rescue) over 5 days *in vitro*. (c) Top: HMLER and HMLER-*PODXL* cells stained for E-cadherin (grey). Scale bars: 30  $\mu$ m. Bottom: Flow cytometric analysis of EpCAM and CD44 levels in HMLER and HMLER-*PODXL* cells. (d) Western blot analysis of EMT markers in breast cancer cells with either KO of *PODXL* or *PODXL* overexpression. (e) Primary tumors formed after orthotopic injection of  $1 \times 10^5$  4175 cells with or without *PODXL* KO into the mammary fat pad of NOD/Scid mice ( $n=5$ ). Tracking of tumor growth over time revealed no differences in growth rate. (f) Representative images of metastatic nodules in the lungs of mice formed by MDA-MB-231 4175 cells as seen in H&E-stained lung sections 5 weeks post-injection. Scale bar = 1 cm. (g) Representative images of tdTomato-positive metastatic nodules formed by tdTomato-positive NAMEC8R cells in the lungs of mice 6 weeks post-injection. Scale bar = 1 cm.

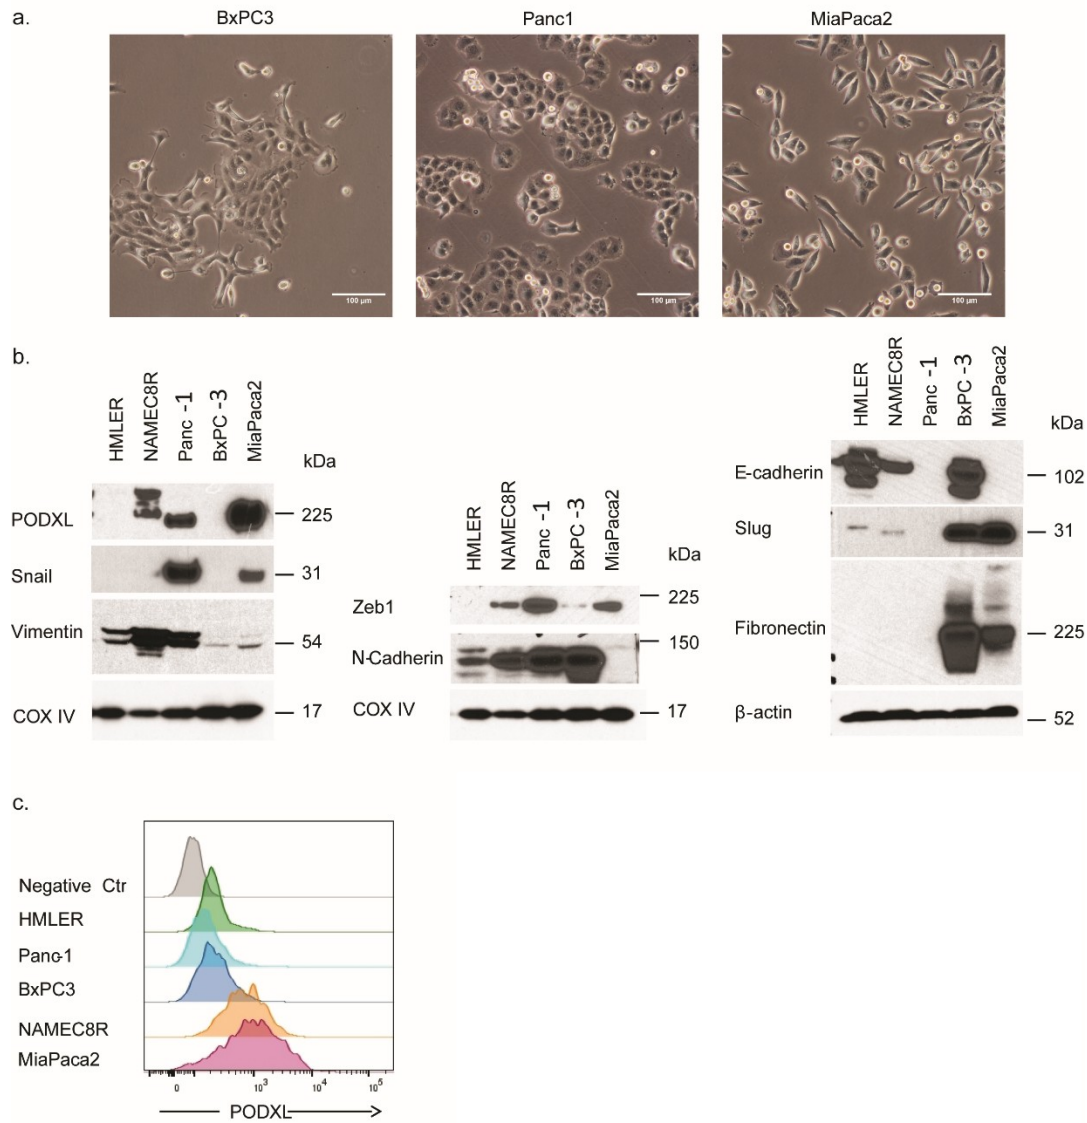

**Figure S5: EMT and PODXL in pancreatic cancer cell lines. Related to Figure 4.** (a) Bright-field images showing the morphology of three pancreatic cancer cell lines growing in monolayer: BxPC3, Panc1 and MiaPaca2. Scalebars: 100  $\mu$ m. (b) Western blot comparing protein expression of PODXL and EMT markers in HMLER and NAMEC8R breast cancer cell lines with three pancreatic cancer cell lines. The two mesenchymal pancreatic cancer cell lines, Panc-1 and MiaPaca2, express high levels of PODXL. (c) Flow cytometric analysis of PODXL cell surface levels in breast and pancreatic cancer cell lines.

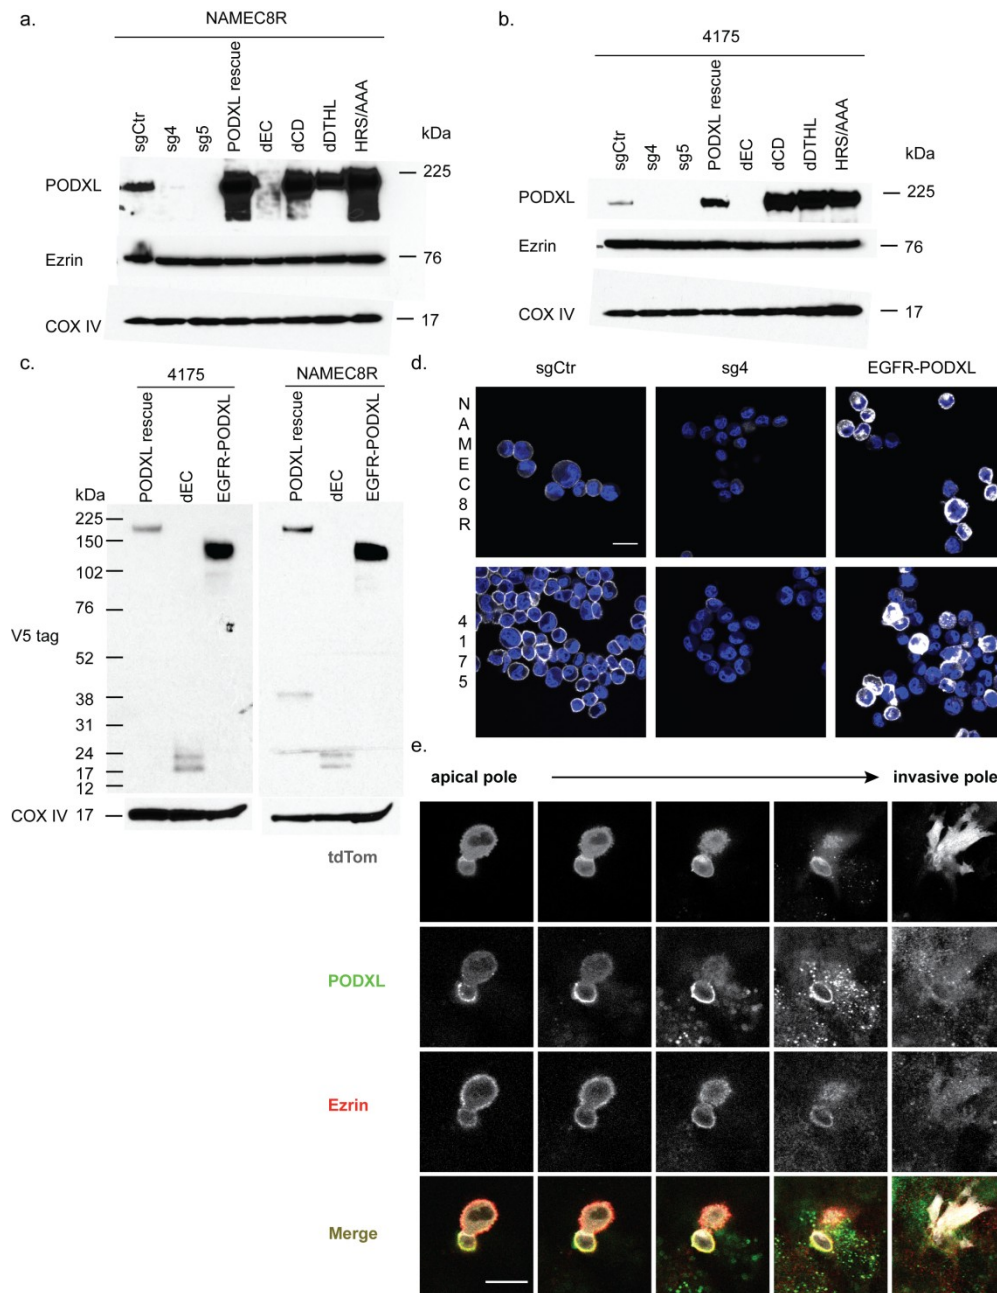

**Figure S6: Expression of PODXL mutants in PODXL KO carcinoma cells. Related to Figure 6.**

(a, b) Western blot analysis of PODXL and ezrin protein levels in NAMEC8R (a) and 4175 (b) cells with (sg4, sg5) or without (sgCtrl) PODXL KO and KO cells expressing either wt PODXL (PODXL rescue) or different PODXL mutants. The antibody against PODXL recognizes the extracellular domain of the protein. (c) Western blot analysis of PODXL protein levels in NAMEC8R and 4175 expressing V5-tagged wt (PODXL rescue), a V5-tagged mutant PODXL with extracellular domain deletion (dEC) or a V5-tagged EGFR-PODXL fusion protein. (d) Immunofluorescent staining of cell surface PODXL (sgCtrl and sg4) or V5-tagged EGFR-PODXL fusion protein in NAMEC8R cells and MDA-MB-231 4175 cells. The EGFR-PODXL fusion protein is expressed on the cell surface of the breast cancer cells. Scalebar: 20  $\mu$ m. (e) NAMEC8R sgCtrl cell transmigrating through HUVEC monolayer into 3D collagen gel. The cell expressed tdTomato (grey) and was stained for ezrin (red) and PODXL (green). A gallery of single xy sections taken at 2.1  $\mu$ m intervals from the apical to the invasive pole is shown. Scale bar: 20  $\mu$ m. Note that the HUVECs also stain positive for PODXL and ezrin.

## Supplemental Methods

### CRISPR/Cas9-mediated knockout

NAMEC8R and 4175 with PODXL knockout (KO) cell lines were generated by lentiviral transduction with the lentiCRISPRv2 backbone (Sanjana et al., 2014) (lentiCRISPR v2 was a gift from Feng Zhang (Addgene plasmid # 52961)) containing target sequences against Exon 1 (sg5) or Exon 2 (sg4) Following lentiviral infection, successful KO of PODXL was confirmed by flow cytometric analysis and western blot analysis of PODXL. Homogeneous cancer cell populations with PODXL KO were acquired by FACS.

### Small guide RNAs for CRISPR/Cas9-mediated knock-out

| Gene       | Sequence Source               | Score | Forward                           | Reverse                       | Target | Number |
|------------|-------------------------------|-------|-----------------------------------|-------------------------------|--------|--------|
| Non-coding | GeCKO-V2 Library HGLibA_6403  | -     | CACCGGTGTCGG<br>ATCCGCCGCTT<br>A  | AAACTAAGCGGCCG<br>AATCCGACACC | -      | 1070   |
| Non-coding | GeCKO-V2 Library HGLibA_64407 | -     | CACCGCTATCTC<br>GAGTGGTAATGC<br>G | AAACCGCATTACCAC<br>TCGAGATAGC | -      | 1071   |
| PODXL      | sgRNA Designer (Broad)        | 0.77  | caccgGTGTATCCA<br>GTGACTCACCG     | aaacCGGTGAGTCACT<br>GGATACACc | Exon2  | Sg4    |
| PODXL      | sgRNA Designer (Broad)        | 0.61  | caccgTCACCATTC<br>TGGGAGGGCGA     | aaacTCGCCCTCCCAG<br>AATGGTGAc | Exon1  | Sg5    |

### Q5 site-directed mutagenesis

Rescue of PODXL KO cells with active Cas9 was achieved by re-expression of PODXL containing a silent mutation in the PAM recognition site previously used by Cas9. For this purpose, the Gateway entry vector pENTR233\_PODXL was used to produce pENTR233\_PODXL G273C using the Q5 site-directed mutagenesis kit (NEB #E0554S). pENTR233\_PODXL was provided by the ORFeome Collaboration (PlasmID clone ID HsCD00378744, PMID 17207965 and 154893350; Storage and distribution provided by the PlasmID Repository at Harvard Medical School and funded in part by NCI Cancer Center Support Grant #NIH 5 P30 CA06516). Primers were designed using the NEBaseChanger Tool (NEB; see Table). Successful point mutation was confirmed by Sanger DNA sequencing. pENTR233\_PODXL G273C was then recombined into the Gateway destination vector pLEX\_307 (pLEX\_307 was a gift from David Root; Addgene plasmid #41392) containing a V5 tag using Gateway LR clonase Enzyme mix (ThermoFischer Scientific #11791019). Other PODXL mutants were produced from pENTR233\_PODXL G273C using the Q5 site-directed mutagenesis kit. The PODXL mutant dEC-PODXL that carries a deletion of the extracellular domain was additionally tagged with V5. The DNA sequences of the PODXL mutants were confirmed by sequencing and the gateway entry vectors were recombined into the Gateway destination vector EBFP membrane.

Lentivirus was produced of all constructs using standard methods (Stewart et al., 2003) and NAMEC8R sg4 and 4175 sg4 cells were stably transduced with the PODXL mutants and sorted for similar cell surface expression/BFP expression by FACS.

### Primers for Q5 site-directed mutagenesis

| Mutant                  | Forward                                      | Reverse                                       |
|-------------------------|----------------------------------------------|-----------------------------------------------|
| <b>PODXL PAM mutant</b> | ACTCACCGGGCACTACAACCC                        | CACTGGATACACCAAGGG                            |
| <b>dEC-PODXL</b>        | CCCCTCATCATCACCATC                           | CAACTTTTTTGTACAAAGTTGG                        |
| <b>dEC-PODXL-V5</b>     | GCTGGGCCTGGATAGCACCTAGCC<br>AACTTCTTGTACAAAG | AGCGGGTTCGGAATCGGTTTGCCCA<br>AGAGGTGTGTGTCTTC |
| <b>PODXL-dCD</b>        | CCAAC TTTCTTGTACAAAGTTGG                     | GCAGCAGCCATAGAGGGC                            |
| <b>PODXL-dDTHL</b>      | CCAAC TTTCTTGTACAAAGTTGG                     | CTCCTCATCCAGGTCGTC                            |
| <b>PODXL-HRS/AAA</b>    | GGCACTCGCACAGAGGAAGGACCA<br>GCAGC            | TGTGCGCAGCAGCCATAGAGGGCCG<br>CCAC             |

### RNA interference using shRNAs

NAMEC8Rs with PODXL or ezrin KD were generated via lentiviral infection with pLKO.1 puro containing shRNA sequences (Addgene plasmid #8453; see Table for shRNA sequences). Control cell lines were generated via lentiviral infection with pLKO.1 TRC control, a gift from David Root (Addgene plasmid #10879; (Moffat et al., 2006)). NAMEC8Rs with ADAM12 KD and control cells were generated with lentiviral infection using GIPZ plasmid purchased from Dharmacon. Briefly, NAMEC8Rs were transduced using lentivirus generated by transfection of HEK293T cells with the viral envelope and packaging plasmids, pCMV-VSV-G (Addgene plasmid #8454) and pCMV-dR8.2 dvpr (Addgene plasmid #8455) were originally developed in the Weinberg lab (Stewart et al., 2003). KD efficiency was assessed using qRT-PCR.

**shRNA sequences**

| <b>Primer</b>                     | <b>Target</b> | <b>Sequence</b>                                                 |
|-----------------------------------|---------------|-----------------------------------------------------------------|
| <b>shTRC Ctr Fwd</b>              | Non-targeting | CCGGCCGCAGGTATGCACGCGTCTCGAGACGCGTGCATA<br>CCTGCGGTTTTTG        |
| <b>shTRC Ctr Rev</b>              | Non-targeting | AATTCAAAAACCGCAGGTATGCACGCGTCTCGAGACGCG<br>TGCATACCTGCGG        |
| <b>sh9 Fwd</b>                    | PODXL         | CCGGAGCCACGTAAGGGACTTTATACTCGAGTATAAAGTC<br>CCTTACGTGGCTTTTTTG  |
| <b>sh9 Rev</b>                    | PODXL         | AATTCAAAAAAGCCACGTAAGGGACTTTATACTCGAGTAT<br>AAAGTCCCTTACGTGGCT  |
| <b>sh11 Fwd</b>                   | PODXL         | CCGGACGAGCGGCTGAAGGACAAATCTCGAGATTTGTCC<br>TTCAGCCGCTCGTTTTTTG  |
| <b>sh11 Rev</b>                   | PODXL         | AATTCAAAAACGAGCGGCTGAAGGACAAATCTCGAGAT<br>TTGTCCTTCAGCCGCTCGT   |
| <b>sh22 Fwd</b>                   | Ezrin         | CCGGCCACGTCTGAGAATCAACAACCTCGAGTTGTTGAT<br>TCTCAGACGTGGGTTTTTG  |
| <b>sh22 Rev</b>                   | Ezrin         | AATTCAAAAACCCACGTCTGAGAATCAACAACCTCGAGTT<br>GTTGATTCTCAGACGTGGG |
| <b>sh23 Fwd</b>                   | Ezrin         | CCGGCGTGGGATGCTCAAAGATAATCTCGAGATTATCTTT<br>GAGCATCCCACGTTTTTG  |
| <b>sh23 Rev</b>                   | Ezrin         | AATTCAAAAACGTGGGATGCTCAAAGATAATCTCGAGATT<br>ATCTTTGAGCATCCCACG  |
| <b>GIPZ Ctr Fwd</b>               | Non-targeting | ATCTCGCTTGGGCGAGAGTAAG                                          |
| <b>GIPZ Ctr Rev</b>               | Non-targeting | CTTACTCTCGCCCAAGCGAGAG                                          |
| <b>Sh-13 GIPZ<br/>(Dharmacon)</b> | ADAM12        | TTGACATTGACGATTCAGG                                             |
| <b>Sh-14 GIPZ<br/>(Dharmacon)</b> | ADAM12        | TTTATGATCAGTTCTTTGC                                             |

## Plasmid Constructs and Virus Production

| Plasmid                                                              | Producer                                                    |
|----------------------------------------------------------------------|-------------------------------------------------------------|
| <b>pCMV-dR8.2 dvpr (Packaging plasmid for Lentiviral constructs)</b> | Addgene plasmid #8455 (Stewart et al., 2003)                |
| <b>pCMV-VSV-g (Envelope plasmid for Lentiviral constructs)</b>       | Addgene plasmid # 8454 (Stewart et al., 2003)               |
| <b>pUMVC (Packaging plasmid for Retroviral constructs)</b>           | Addgene plasmid # 8449 (Moffat et al., 2006)                |
| <b>pFUW-LPT2 Zeb1</b>                                                | Z. Keckesova                                                |
| <b>pFUW-LPT2 hSnail</b>                                              | Z. Keckesova (Lu et al., 2014 Nov)                          |
| <b>pLEX_307</b>                                                      | Addgene plasmid #41392                                      |
| <b>pcDNA3.1(+)/Luc2=tdT</b>                                          | Addgene plasmid #32904                                      |
| <b>pENTR1A Dual Selection Vector</b>                                 | ThermoFischer Scientific #A10462                            |
| <b>lentiCRISPRv2</b>                                                 | Addgene plasmid #52961 (Sanjana et al., 2014)               |
| <b>pENTR223_PODXL</b>                                                | PlasmID Repository at Harvard Medical School (HsCD00378744) |
| <b>pGIPZ</b>                                                         | Dharmacon                                                   |
| <b>pLKO.1 puro</b>                                                   | Addgene plasmid #8453 (Stewart et al., 2003)                |
| <b>pLKO.1 TRC control</b>                                            | Addgene plasmid #10879 (Moffat et al., 2006)                |
| <b>pLV-clover-mouse Par1b</b>                                        | T. Shibue                                                   |
| <b>pLV-clover mouse PKC-iota</b>                                     | T. Shibue                                                   |
| <b>Gateway Dest. EBFP mem</b>                                        | B. Bierie                                                   |
| <b>pLV-lifeact-mRuby2</b>                                            | T. Shibue (Shibue et al., 2012)                             |
| <b>pWZL-HRAS(G12V)-Blast</b>                                         | W.L. Tam (Tam et al., 2013)                                 |

## Western Blot Analyses

Cells were harvested in RIPA buffer containing phosphatase inhibitors 2/3 (1:100; Sigma-Aldrich #P5726 & #P0044) and protease inhibitor (1:100; Sigma Aldrich #P8340). NUPAGE Bis-Tris Mini Gels (ThermoFischer Scientific) were transferred to PVDF membranes using XCell II mini cell apparatus and blocked in 5% non-fat dry milk/TBS-T. Membranes were incubated with antibodies overnight, as recommended for each antibody protocol. Membranes were washed with TBS-T, and incubated with secondary antibody in 5% non-fat dry milk/TBS-T for 1 hour at room temperature, followed by washing and detection via ECL reagent.

## Antibodies for Western Blot Analyses

| Antibody                                         | Specificity                         | Dilution                         | Method       | Producer                          |
|--------------------------------------------------|-------------------------------------|----------------------------------|--------------|-----------------------------------|
| <b>Mouse anti human PODXL</b>                    | Total PODXL (extracellular epitope) | 1:500 (5% Milk/TBS-T)            | Western blot | Santa Cruz #sc-23904              |
| <b>Mouse anti-human Ezrin</b>                    | Total Ezrin                         | 1:1,000 (5% Milk/TBS-T)          | Western blot | Sigma Aldrich #E-8897             |
| <b>Rabbit anti-human COX IV</b>                  | Total COX IV                        | 1:5,000 (3% BSA/TBS-T)           | Western blot | Cell Signaling Technology #4850   |
| <b>rabbit anti-human GAPDH</b>                   | total GAPDH                         | 1:5,000 (5% BSA/TBS-T)           | Western blot | Cell Signaling Technology #2118S  |
| <b>Rabbit anti-human E-cadherin</b>              | E-cadherin                          | 1:1,000 (5% BSA/TBS-T)           | Western blot | Cell Signaling Technology #3195   |
| <b>Mouse anti-human N-cadherin</b>               | N-cadherin                          | 1:1,000 (5% BSA/TBS-T)           | Western blot | BD Pharmingen #610921             |
| <b>Mouse anti human-Fibronectin</b>              | Fibronectin                         | 1:1,000 (5% BSA/TBS-T)           | Western blot | BD Biosciences #610078            |
| <b>Rabbit anti-human Vimentin</b>                | Vimentin                            | 1:1,000 (5% BSA/TBS-T)           | Western blot | Cell Signaling Technology #3932   |
| <b>Rabbit anti-human Zeb1</b>                    | Zeb1                                | 1:1,000 (5% BSA/TBS-T)           | Western blot | Cell Signaling Technology #3396   |
| <b>Rabbit anti-human Snail</b>                   | Snail                               | 1:1,000 (5% BSA/TBS-T)           | Western blot | Cell Signaling Technology #3879   |
| <b>Mouse anti-V5 tag [GT1071] antibody</b>       | V5 tag                              | 1:1,000 (5% Milk/TBS-T)          | Western blot | GeneTex #GTX628529                |
| <b>Rabbit anti-human MARK2 (Par1b)</b>           | MARK2/Par1b                         | 1:1,000 (5% BSA/TBS-T)           | Western blot | Cell Signaling Technology #9118S  |
| <b>Biotinylated anti-mouse IgG, HRP-coupled</b>  | Mouse IgG                           | 1:10,000 (5 % Milk in 1 M TBS-T) | Western blot | Cell Signaling Technology #7076S  |
| <b>Biotinylated anti-rabbit IgG, HRP-coupled</b> | Rabbit IgG                          | 1:5,000 (5 % Milk in 1 M TBS-T)  | Western blot | Cell Signaling Technology #7074P2 |

## FACS

The cells were prepared and stained according to standard protocols and suspended in 5% IFS/PBS. For staining of PODXL, cells were detached using an enzyme-free cell dissociation buffer (ThermoFischer Scientific, #13151014) instead of trypsin. Cells were sorted on BD FACSAria SORP and analyzed on BD LSRII, using BD FACSDiva Software (BD Biosciences). Data were processed and analyzed using Flowjo (Flowjo LLC). Antibodies used are ms anti-PODXL-Alexa647 (Nuromab; CureMeta), CD44-PE-Cy7 (Biolegend #103029), EpCAM-PacificBlue (Biolegend #324218), CD104-PE (Biolegend #327808) at 1:100 dilution and CD24-FITC (BD Pharmingen #555427) at 1:30 dilution for 30 minutes in 5% IFS/PBS.

## Migration, invasion and transendothelial migration assays

For transendothelial migration assays, FluoroBlok transwells (Corning Life Sciences, #351152) were coated with collagen, seeded with  $5 \times 10^5$  HUVECs and cultured at 37°C, 5% CO<sub>2</sub> for 24 h. Tightness of the endothelial monolayer was tested on two HUVEC-coated transwells by FITC-Dextran (EMD Millipore #90328) permeability following the guidelines of the FITC-Dextran vascular permeability assay (EMD Millipore #ECM644) and compared to an empty transwell. The other transwells containing HUVEC monolayers were seeded with  $5 \times 10^4$  fluorescently labeled cancer cells, incubated for 24 h and the successfully transmigrated cells were counted using the Axio Observer A1 microscope (Zeiss). Per transwell, 3 fields of view at 10x magnification were analyzed.



For migration assays,  $5 \times 10^4$  cancer cells were seeded into transwells (Corning Life Sciences, #353097). For invasion assays, transwells containing dehydrated matrigel (Corning Life Sciences, #354483) were rehydrated according to protocol prior to cancer cell seeding and then seeded like migration assays. The seeded transwells were incubated for 24 h, fixed in methanol and transmigrated cancer cells were stained using crystal violet (0.01%) in 20% methanol. Per transwell, 3 fields of view at 10x magnification were counted using the Axio Observer A1 microscope (Zeiss). In order to correct for differences in cell numbers due to seeding errors and proliferation, cancer cells of the same cells solution used to seed the migration/invasion/transendothelial migration assay were seeded for a proliferation assay for 24 h and the average number of cells per cell type was determined using CyQuant (Thermo Fisher Scientific, C7026). The normalized cell counts were then used to correct the number of transmigrated cells and data were plotted using GraphPad Prism.

### **Proliferation assay**

Proliferation assays were conducted in 96-well plates using CyQuant (Thermo Fisher Scientific, C7026), according to the manufacturer's recommendations, to measure DNA content in each well during a 5-d time course. The first day after seeding was counted as *Day 0* and used for normalization of values obtained from plates collected at subsequent time points.

### **Immunofluorescent staining of cancer cell migration through HUVEC monolayers cultured on collagen I gels**

For immunofluorescent staining of proteins, samples were fixed after 3 h of co-culture using 4 % PFA for 20 min at room temperature (RT) and stained as previously described (Artym and Matsumoto, 2010). Primary antibodies used were mouse anti-PODXL (Santa Cruz, #sc-23904), mouse anti-Ezrin (Santa Cruz, #sc-58758) at 1:50 and rabbit anti-Ezrin (Cell Signaling Technology #3145) at 1:50. Cells were imaged using the LSM710 confocal microscope (Zeiss). Multiple z-stacks were acquired per well at different locations using a 63x oil objective and analyzed using Imaris software (Bitplane).

### **Immunohistochemistry**

Tissue microarrays BR1503e and BRM961a were purchased from US Biomax, Inc.. Slides were rehydrated in a descending alcohol series. Antigen retrieval of tissue sections was performed at 125°C for 20 min in pH 6.0-Sodium citrate buffer, washed with PBS and endogenous peroxidase activity was blocked using BLOXALL endogenous peroxidase and alkaline phosphatase blocking solution (Vector Laboratories, #SP6000). After washing, endogenous streptavidin/biotin was blocked using a streptavidin/biotin blocking kit (Vector Laboratories SP-2002). Following another washing step, the microarrays were blocked using Background Terminator (Biocare Medical #BT967 H,L) for 7 min at RT to reduce nonspecific antibody binding. Slides were then washed three times. All wash steps were performed with PBS. Staining was performed at 4°C over night using biotin-labeled monoclonal mouse anti-human PODXL antibody (1:50 in PBS; CureMeta). Following three wash steps, slides were incubated with ABC reagent (Vector Laboratories, Vectastain Elite ABC-HRP kit (Peroxidase, mouse IgG) #PK-6102) for 30 minutes at room temperature. Peroxidase reaction was performed using ImmPACT DAB peroxidase substrate (Vector Laboratories #SK-4105) and the reaction was stopped with diH<sub>2</sub>O. Tissues were then counterstained using hematoxylin QS (Vector Laboratories #H-3404). Following dehydration in an ascending alcohol series, slides were mounted in Vectamount Mounting Medium (Vector Laboratories #H-5000). For imaging, slides were scanned using the Aperio Digital Pathology slide scanner (Leica Biosystems) and analyzed using the Aperio Image Scope (Leica Biosystems) software.

### **Immunofluorescence (IF) on suspended cells**

Cancer cells were harvested using an enzyme-free cell dissociation buffer (ThermoFischer Scientific, #13151014) and pelleted at 3000 rpm for 5 min by centrifugation. The cells were then fixed by addition of 4% PFA for 10 min at RT under rotation. Following two washing steps with PBS, cells were blocked in 50 µl blocking buffer (10 % HS + 3 % BSA) for 30 min at RT under rotation. Next, the primary antibodies ms anti-PODXL-Alexa647 (Nuromab, CureMeta) or ms anti-V5 tag [GT1071] (GeneTex #GTX628529) were diluted at 1:50 in blocking buffer and 50 µl were added to each sample. Samples were incubated over night at 4°C under rotation. On the next day, cells were washed four times with PBS and then stained with DAPI (1:1000 in blocking buffer) for 10 min at RT or with DAPI (1:1000 in blocking buffer) and gt anti-ms A647 (Invitrogen #A21235; 1:200 in blocking buffer). Cells were washed three times with PBS and then resuspended in 10 µl ProLong Gold antifade mounting medium with DAPI (Lifetech

#P36931) and loaded onto histology slides and coverslipped. Samples were air dried and stored at 4°C prior to imaging with LSM700 confocal microscope (Zeiss).

### Quantitative Real time PCR (qRT-PCR)

RNA extraction was performed on collected cell pellets according to the guidelines of the Qiagen RNeasy® Plus extraction protocol. The purified RNA was reverse transcribed into cDNA using a high-capacity cDNA reverse transcription kit (Applied Biosystems #4368814) according to the manufacturers guidelines. In total, 1 µg RNA per sample was reverse transcribed using the MyCycler Thermal Cycler. In order to analyze the expression levels of several proteins, the cDNA was diluted by the addition of 80 µl H<sub>2</sub>O to a final volume of 100 µl. For each reaction 2 µl of each cDNA sample were mixed with 10 µl LightCycler 480 SYBR Green I Master mix (2 x), 6.4 µl H<sub>2</sub>O and 1.6 µl of forward and reverse primer mix (10 µM forward + 10 µM reverse primer). All samples were loaded on a 384 well plate and analyzed by quantitative real time PCR using the Roche Light cycler 480 II. The mRNA levels of genes of interest (e.g. PODXL) were normalized to the mRNA levels of the housekeeping gene GAPDH. The data were then analyzed using Excel and plotted with GraphPad Prism.

### Primers for qRT-PCR

| Gene   | Forward                    | Reverse                     |
|--------|----------------------------|-----------------------------|
| GAPDH  | GGTCTCCTCTGACTTCAACA       | GTGAGGGTCTCTCTTCTCCT        |
| SNAI2  | TGACCTGTCTGCAAATGCTC       | TCGGACCCACACATTACCTT        |
| SNAI1  | CTGGGTGCCCTCAAGATGCA       | CCGGACATGGCCTTGTAGCA        |
| TWIST1 | GGAGTCCGCAGTCTTACGAG       | TCTGGAGGACCTGGTAGAGG        |
| ZEB1   | CCAGGTGTAAGCGCAGAAA        | CCACAATATGCAGTTTGTCTT<br>CA |
| CDH1   | GTCGAGGGAAAAATAGGCTG       | TTGACGCCGAGAGCTACAC         |
| FN1    | AAACCAATTCTTGGAGCAGG       | CCATAAAGGGCAACCAAGAG        |
| SLIT2  | AGCCGAGGTTCAAAAACGAG<br>A  | GGCAGTGCAAAACACTACAA<br>GA  |
| PODXL  | AGCTAAACCTAACACCACAA<br>GC | TGAGGGGTCGTCAGATGTTCT       |
| ADAM12 | CGAGGGGTGAGCTTATGGAA<br>C  | GCTTCCCGTTGTAGTCGAAT<br>A   |
| EZR    | CTCTGCATCCATGGTGGTAA       | GATAGTCGTGTTTTCGGGGA        |

### Bioinformatic analysis of mRNA sequencing data

In order to look for cell surface proteins that are differentially expressed in cells prior to and after an EMT, a previously published mRNA sequencing data set was analyzed (Pattabiraman et al., 2016). The data set was filtered for genes that had a mean number of reads equal to or greater than 200 (=9797 genes). Furthermore, only genes that were upregulated at least 3-fold on a log<sub>2</sub> scale were included (256 genes). Gene expression data were clustered using Cluster 3.0 and visualized using Java TreeView (de Hoon et al., 2004; Saldanha, 2004). We selected several candidate genes that might be involved in the regulation of adhesion to endothelial cells, transendothelial migration and invasion of these cells, focusing in particular on cell-surface proteins.

## References

- Artym, V.V., and Matsumoto, K. (2010). Imaging cells in three-dimensional collagen matrix. *Current protocols in cell biology Chapter 10*, Unit 10 18 11-20.
- de Hoon, M.J., Imoto, S., Nolan, J., and Miyano, S. (2004). Open source clustering software. *Bioinformatics 20*, 1453-1454.
- Lu, H., Clauser, K.R., Tam, W.L., Fröse, J., Ye, X., Eaton, E.N., Reinhardt, F., Donnenberg, V.S., Bhargava, R., Carr, S.A., *et al.* (2014 Nov). A breast cancer stem cell niche supported by juxtacrine signalling from monocytes and macrophages. *Nat Cell Biol.*
- Moffat, J., Grueneberg, D.A., Yang, X., Kim, S.Y., Klopfer, A.M., Hinkle, G., Piqani, B., Eisenhaure, T.M., Luo, B., Grenier, J.K., *et al.* (2006). A lentiviral RNAi library for human and mouse genes applied to an arrayed viral high-content screen. *Cell 124*, 1283-1298.
- Pattabiraman, D.R., Bierie, B., Kober, K.I., Thiru, P., Krall, J.A., Zill, C., Reinhardt, F., Tam, W.L., and Weinberg, R.A. (2016). Activation of PKA leads to mesenchymal-to-epithelial transition and loss of tumor-initiating ability. *Science 351*, aad3680.
- Saldanha, A.J. (2004). Java Treeview--extensible visualization of microarray data. *Bioinformatics 20*, 3246-3248.
- Sanjana, N.E., Shalem, O., and Zhang, F. (2014). Improved vectors and genome-wide libraries for CRISPR screening. *Nat Methods 11*, 783-784.
- Shibue, T., Brooks, M.W., Inan, M.F., Reinhardt, F., and Weinberg, R.A. (2012). The outgrowth of micrometastases is enabled by the formation of filopodium-like protrusions. *Cancer Discov 2*, 706-721.
- Stewart, S.A., Dykxhoorn, D.M., Palliser, D., Mizuno, H., Yu, E.Y., An, D.S., Sabatini, D.M., Chen, I.S., Hahn, W.C., Sharp, P.A., *et al.* (2003). Lentivirus-delivered stable gene silencing by RNAi in primary cells. *RNA (New York, NY) 9*, 493-501.
- Tam, W.L., Lu, H., Buikhuisen, J., Soh, B.S., Lim, E., Reinhardt, F., Wu, Z.J., Krall, J.A., Bierie, B., Guo, W., *et al.* (2013). Protein kinase C alpha is a central signaling node and therapeutic target for breast cancer stem cells. *Cancer Cell 24*, 347-364.
